# Supplementary material
Source: Royal Society of Chemistry journal article supplement (doi:10.1039/d6ob00444j)
Supplement: d6ob00444j1.pdf [file d6ob00444j1.pdf]

**Supporting Information for**  
**Visible light-induced synthesis of benzofuro[3,2-b]pyridines from**  
**aurone-derived 1-azadienes**

*Jiale Fan, Jianwei Xie, Ping Lu\* and Yanguang Wang\**

*Department of Chemistry, Zhejiang University, Hangzhou 310058, P. R. China*

**Content**

|                                                                                 |         |
|---------------------------------------------------------------------------------|---------|
| 1. General information .....                                                    | S2      |
| 2. General procedure for the synthesis of compounds <b>2</b> and <b>3</b> ..... | S2-S3   |
| 3. Procedure for the synthesis of compound <b>4</b> .....                       | S3      |
| 4. Analytic data for compounds <b>2</b> , <b>3</b> and <b>4</b> .....           | S3-S20  |
| 5. Copies of NMR spectra of compounds <b>2</b> , <b>3</b> and <b>4</b> .....    | S21-S44 |
| 6. Copies of HRMS spectra of <b>2a</b> , <b>3a</b> and <b>2p</b> .....          | S45     |
| 7. X-Ray crystallography of <b>2a</b> and <b>3a</b> .....                       | S46-S48 |
| 8. References.....                                                              | S48     |

## 1. General information

NMR spectral data were recorded at 500 MHz for  $^1\text{H}$  NMR, 125 MHz for  $^{13}\text{C}$  NMR. Chemical shift values for  $^1\text{H}$  NMR were expressed in parts per million (ppm) relative to tetramethylsilane (TMS) at 0.0 ppm.  $^{13}\text{C}\{^1\text{H}\}$  NMR spectra were obtained using the same NMR spectrometers, and chemical shifts were reported in ppm relative to the center line of the  $\text{CDCl}_3$  triplet at 77.00 ppm. Coupling constants ( $J$  values) are provided in Hz. All high-resolution mass spectra (HRMS) were acquired using ESI on a quadrupole time-of-flight (Q-TOF) mass spectrometer. Flash column chromatography was performed using prepacked flash chromatography columns (300-400 mesh silica gel). Reactions driven by visible light were conducted in a parallel light reactor, enabling simultaneous processing.

All chemicals, solvents, and reagents were purchased from commercial suppliers and used without further purification. Aurone-derived azadienes **1a-r** were synthesized according to the published procedure.<sup>1</sup>

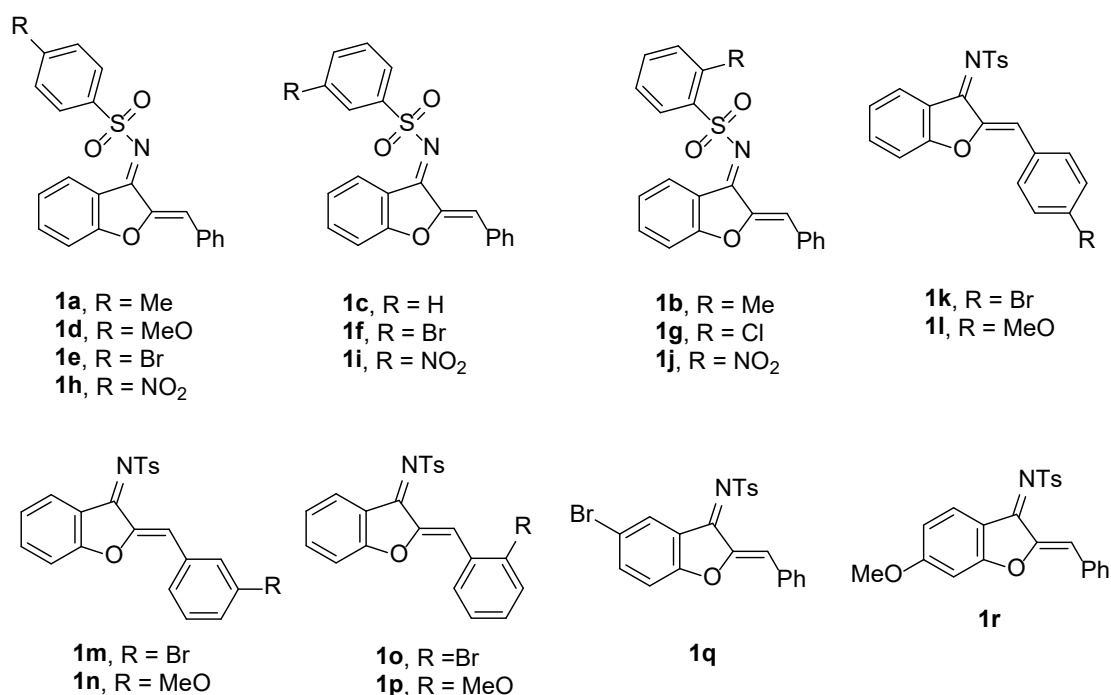

## 2. General Procedure for the synthesis of compounds 2 and 3

**Method A:** 1-Azadiene **1** (0.1 mmol) was dissolved in dichloromethane (DCM, 0.5 mL). The solution was then irradiated with a 10 W blue LED (450-455 nm) at room

temperature for 26 hours. Following solvent removal under vacuum,  $K_2CO_3$  (2 equiv) and methanol (2 mL) were introduced to the mixture. The resulting solution was heated at 90 °C for an additional 40 hours. Upon cooling to room temperature, 1 mL of aqueous HCl (0.1M) was added, and the product was extracted with DCM ( $2 \times 5$  mL). The organic layers were combined and dried over anhydrous magnesium sulfate. After removing the solvent under vacuum, the residue was purified via silic gel column chromatography (petroleum ether/AcOEt/DCM = 10:1:2, v/v) to afford pure product.

**Method B:** 1-Azadiene **1** (0.1 mmol) was dissolved in DCM (0.5 mL). The solution was irradiated with a 10 W blue LED (450-455 nm) at room temperature for 26 hours. After removing the solvent under vacuum, the residue was subjected to silic gel column chromatography (petroleum ether/AcOEt/DCM = 10:1:2, v/v) to give pure product.

### 3. Procedure for the synthesis of compound **4**

To a solution of **2a** (0.1 mmol) in MeOH (2 mL) was added  $NaBH_4$  (0.1 mol). The resulting mixture was stirred at room temperature for 12 hours. Then 1 mL of water was added to quench the reaction. After removing the solvent in vacuo, the residue was extracted with dichloromethane ( $2 \times 10$  mL), and dried over with anhydrous sodium sulfate. The solvent was removed and the crude product was purified by silic gel column chromatography (petroleum ether/AcOEt = 10:1, v/v) to give pure **4** (42 mg, 71% yield).

### 4. Analytic data for all products **2**, **3** and **4**

*N*-((3,4-Diphenylbenzofuro[3,2-*b*]pyridin-2-yl)(2-hydroxyphenyl)methylene)-4-methylbenzenesulfonamide (**2a**)

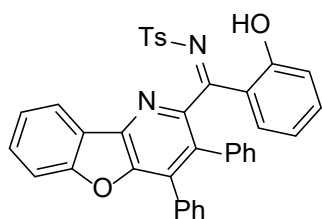

White solid (12 mg, 40% yield); mp = 234-235 °C;

$^1H$  NMR(500 MHz,  $CDCl_3$ ):  $\delta$  12.0 (s, 1H), 8.19 (d,  $J = 8.0$  Hz, 1H), 7.87 (d,  $J = 8.0$

Hz, 2H), 7.68-7.61 (m, 2H), 7.51 (td,  $J = 7.0, 1.0$  Hz, 1H), 7.42-7.38 (m, 2H), 7.35-7.30 (m, 5H), 7.27 (t,  $J = 8.0$  Hz, 2H), 7.20-6.99 (m, 4H), 6.89 (dd,  $J = 8.0, 1.0$  Hz, 1H), 6.80 (d,  $J = 8.0$  Hz, 1H), 6.61 (td,  $J = 7.0, 1.0$  Hz, 1H), 2.44 (s, 3H);

$^{13}\text{C NMR}$ (125 MHz,  $\text{CDCl}_3$ ):  $\delta$  178.1, 162.7, 158.3, 148.4, 148.1, 144.5, 142.8, 137.3, 136.3, 134.8, 133.6, 133.4, 132.8, 131.9, 131.0, 130.6, 129.7, 129.7, 128.5, 128.1, 128.0, 127.8, 123.9, 123.0, 121.5, 118.9, 118.6, 118.2, 112.6, 21.7;

**IR** (KBr): 3069, 2923, 1676, 1654, 1618, 1586, 1560, 1438, 1370, 1333, 1227, 1203, 1162, 1086, 822, 746  $\text{cm}^{-1}$ ;

**HRMS** (ESI-TOF)  $m/z$   $[\text{M} + \text{H}]^+$  calcd for  $\text{C}_{37}\text{H}_{27}\text{N}_2\text{O}_4\text{S}$  595.1686, found 595.1684.

( $\pm$ )-*N*-((2*S*,3'*S*,4'*S*,*E*)-3',4'-Diphenyl-1'-tosyl-3',4'-dihydro-1'*H*,3*H*-spiro[benzofuran-2,2'-benzofuro[3,2-*b*]pyridin]-3-ylidene)-4-methylbenzenesulfonamide (**3a**)

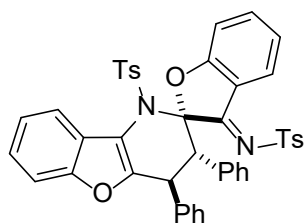

White solid (8 mg, 21% yield); mp = 123-124  $^{\circ}\text{C}$ .

$^1\text{H NMR}$ (500 MHz,  $\text{CDCl}_3$ ):  $\delta$  8.52 (d,  $J = 8.0$  Hz, 1H), 8.09 (d,  $J = 8.0$  Hz, 2H), 7.46 (d,  $J = 8.0$  Hz, 2H), 7.43-7.39 (m, 3H), 7.34 (t,  $J = 7.5$  Hz, 1H), 7.19-7.10 (m, 4H), 7.04-6.91 (m, 9H), 6.89-6.85 (m, 2H), 6.81 (d,  $J = 8.0$  Hz, 1H), 6.57 (t,  $J = 7.5$  Hz, 1H), 6.41 (t,  $J = 8.5$  Hz, 1H), 4.76 (d,  $J = 14.5$  Hz, 1H), 4.63 (d,  $J = 14.5$  Hz, 1H), 2.57 (s, 3H), 2.29 (s, 3H).

$^{13}\text{C NMR}$ (125 MHz,  $\text{CDCl}_3$ ):  $\delta$  175.4, 174.9, 167.8, 152.4, 144.4, 143.7, 139.0, 138.6, 136.0, 130.6, 130.5, 130.4, 130.0, 129.5, 129.0, 128.9, 128.9, 128.4, 128.3, 128.2, 128.2, 128.1, 127.3, 125.5, 123.8, 122.6, 117.7, 111.6, 110.9, 102.3, 59.4, 56.0, 21.7, 21.5.

**IR** (KBr): 3031, 2924, 1814, 1602, 1496, 1477, 1461, 1323, 1305, 1186, 1157, 1089, 1018, 871, 834, 755  $\text{cm}^{-1}$ ;

**HRMS** (ESI-TOF)  $m/z$   $[\text{M} + \text{Na}]^+$  calcd for  $\text{C}_{44}\text{H}_{34}\text{N}_2\text{NaO}_6\text{S}_2$  773.1750, found

773.1751.

*N*-((3,4-Diphenylbenzofuro[3,2-*b*]pyridin-2-yl)(2-hydroxyphenyl)methylene)-2-methylbenzenesulfonamide (**2b**)

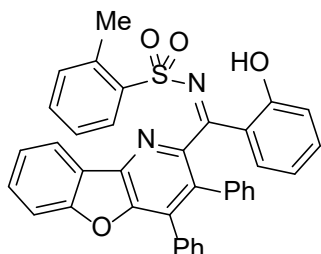

Red solid (9 mg, 30% yield); mp = 92-93 °C;

<sup>1</sup>H NMR(500 MHz, CDCl<sub>3</sub>): δ 12.07 (s, 1H), 8.05 (d, *J* = 8.0 Hz, 1H), 7.75 (dd, *J* = 8.0, 1.0 Hz, 1H), 7.67-7.60 (m, 2H), 7.52-7.45 (m, 2H), 7.42-7.39 (m, 2H), 7.36 (d, *J* = 7.5 Hz, 1H), 7.34-7.31 (m, 3H), 7.30-7.27 (m, 2H), 7.22 (t, *J* = 7.5 Hz, 1H), 7.19-6.92 (m, 4H), 6.89 (dd, *J* = 8.0, 1.0 Hz, 1H), 6.81 (dd, *J* = 8.0, 1.0 Hz, 1H), 6.61 (td, *J* = 8.0, 1.0 Hz, 1H), 2.84 (s, 3H);

<sup>13</sup>C NMR(125 MHz, CDCl<sub>3</sub>): δ 179.3, 162.6, 158.3, 148.4, 148.1, 142.7, 138.9, 138.4, 136.5, 134.8, 133.7, 133.5, 133.4, 132.8, 132.6, 132.0, 131.0, 130.7, 129.7, 129.5, 128.5, 128.1, 127.8, 125.1, 123.8, 122.9, 121.6, 118.9, 118.7, 118.2, 112.5, 20.7;

IR (KBr): 3058, 2924, 1654, 1625, 1560, 1474, 1420, 1382, 1325, 1194, 1159, 1131, 1064, 874, 747, 696 cm<sup>-1</sup>;

HRMS (ESI-TOF) *m/z* [M + H]<sup>+</sup> calcd for C<sub>37</sub>H<sub>27</sub>N<sub>2</sub>O<sub>4</sub>S 595.1686, found 595.1688.

(±)-*N*-((2*S*,3'*S*,4'*S*)-3',4'-Diphenyl-1'-(*o*-tolylsulfonyl)-3',4'-dihydro-1'*H*,3*H*-spiro[benzofuran-2,2'-benzofuro[3,2-*b*]pyridin]-3-ylidene)-2-methylbenzenesulfonamide (**3b**)

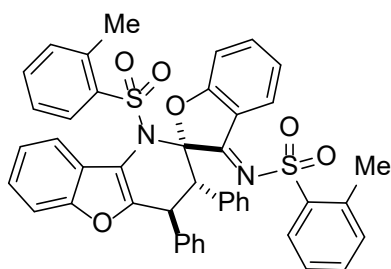

White solid. (15 mg, 40% yield); mp = 159-160 °C;

<sup>1</sup>H NMR(500 MHz, CDCl<sub>3</sub>): δ 8.16 (d, *J* = 8.5 Hz, 1H), 7.80 (t, *J* = 8.0 Hz, 2H), 7.49-7.44 (m, 2H), 7.28-7.26 (m, 2H), 7.23-7.14 (m, 7H), 7.11 (t, *J* = 8.0 Hz, 2H), 7.07 (dd, *J* = 7.5, 1.0 Hz, 2H), 7.00-6.95 (m, 3H), 6.92-6.88 (m, 3H), 6.84 (t, *J* = 8.0 Hz, 1H), 6.46 (t, *J* = 7.5 Hz, 1H), 5.08 (d, *J* = 12.0 Hz, 1H), 3.86 (d, *J* = 12.0 Hz, 1H), 2.69 (s, 3H), 2.63 (s, 3H);

<sup>13</sup>C NMR(125 MHz, CDCl<sub>3</sub>): δ 178.7, 168.6, 153.6, 140.3, 139.4, 139.1, 138.1, 138.0, 136.6, 136.5, 132.7, 132.4, 132.3, 132.1, 131.3, 130.1, 129.1, 128.7, 128.6, 128.5, 128.4, 127.9, 127.6, 127.4, 125.0, 125.9, 125.4, 124.1, 123.0, 122.5, 122.4, 122.0, 121.3, 119.7, 118.3, 112.9, 111.5, 99.8, 58.5, 42.4, 20.8, 20.6;

IR (KBr): 3061, 2925, 1602, 1497, 1460, 1351, 1316, 1159, 1130, 1064, 1017, 967, 871, 828, 754 cm<sup>-1</sup>;

HRMS (ESI-TOF) *m/z* [M + Na]<sup>+</sup> calcd for C<sub>44</sub>H<sub>34</sub>N<sub>2</sub>NaO<sub>6</sub>S<sub>2</sub> 773.1750, found 773.1749.

*N*-((3,4-Diphenylbenzofuro[3,2-*b*]pyridin-2-yl)(2-hydroxyphenyl)methylene)-benzenesulfonamide (**2c**)

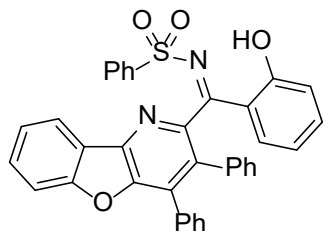

White solid (10 mg, 35% yield); mp = 204-205 °C;

<sup>1</sup>H NMR(500 MHz, CDCl<sub>3</sub>): δ 11.96 (s, 1H), 8.19 (d, *J* = 8.0 Hz, 1H), 8.00 (d, *J* = 8.0 Hz, 2H), 7.68-7.62 (m, 3H), 7.54 (t, *J* = 8.0 Hz, 2H), 7.50 (td, *J* = 8.0, 1.0 Hz, 1H), 7.42-7.39 (m, 2H), 7.35-7.31 (m, 3H), 7.30-7.27 (m, 1H), 7.21-6.99 (m, 5H), 6.90 (dd, *J* = 8.0, 1.0 Hz, 1H), 6.81 (d, *J* = 8.0 Hz, 1H), 6.63 (t, *J* = 8.0 Hz, 1H);

<sup>13</sup>C NMR(125 MHz, CDCl<sub>3</sub>): δ 178.7, 162.8, 158.3, 148.4, 148.1, 142.9, 140.3, 136.5, 134.8, 133.7, 133.5, 133.4, 132.9, 131.9, 130.7, 129.8, 129.1, 128.5, 128.1, 128.0, 127.9, 125.4, 123.9, 123.0, 121.5, 119.0, 118.6, 118.2, 112.6, 110.0;

**IR** (KBr): 3060, 1618, 1586, 1537, 1459, 1370, 1327, 1238, 1225, 1202, 1158, 1087, 978, 874, 749  $\text{cm}^{-1}$ ;

**HRMS** (ESI-TOF)  $m/z$   $[M + \text{Na}]^+$  calcd for  $\text{C}_{36}\text{H}_{24}\text{N}_2\text{NaO}_4\text{S}$  603.1349, found 603.1351.

( $\pm$ )-*N*-((2*S*,3'*S*,4'*S*,*E*)-3',4'-Diphenyl-1'-(phenylsulfonyl)-3',4'-dihydro-1'*H*,3*H*-spiro[benzofuran-2,2'-benzofuro[3,2-*b*]pyridin]-3-ylidene)benzenesulfonamide (**3c**)

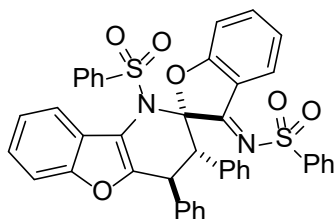

White solid (11 mg, 30% yield); mp = 132-133  $^{\circ}\text{C}$ ;

**$^1\text{H}$  NMR**(500 MHz,  $\text{CDCl}_3$ ):  $\delta$  8.06 (d,  $J = 8.0$  Hz, 2H), 7.69 (d,  $J = 7.5$  Hz, 2H), 7.64 (t,  $J = 7.5$  Hz, 2H), 7.57 (t,  $J = 7.5$  Hz, 2H), 7.54-7.49 (m, 2H), 7.44 (t,  $J = 8.0$  Hz, 1H), 7.32-7.27 (m, 3H), 7.25-7.22 (m, 2H), 7.17 (t,  $J = 8.0$  Hz, 1H), 7.10-7.06 (m, 3H), 6.97-6.92 (m, 3H), 6.89 (s, 3H), 6.82 (d,  $J = 7.5$  Hz, 2H), 4.78 (d,  $J = 12.0$  Hz, 1H), 3.57 (d,  $J = 12.0$  Hz, 1H);

**$^{13}\text{C}$  NMR**(125 MHz,  $\text{CDCl}_3$ ):  $\delta$  178.2, 174.5, 157.6, 153.9, 141.0, 139.0, 137.9, 136.2, 133.2, 132.9, 132.1, 129.0, 128.8, 128.7, 128.6, 128.5, 128.2, 127.9, 127.8, 127.8, 127.3, 125.9, 125.8, 124.5, 123.0, 122.7, 122.6, 117.8, 111.5, 111.2, 100.1, 43.0, 29.7;

**IR** (KBr): 3063, 2925, 1603, 1497, 1477, 1448, 1370, 1324, 1257, 1160, 1089, 1016, 966, 874, 753  $\text{cm}^{-1}$ ;

**HRMS** (ESI-TOF)  $m/z$   $[M + \text{Na}]^+$  calcd for  $\text{C}_{42}\text{H}_{30}\text{N}_2\text{NaO}_6\text{S}_2$  745.1437, found 745.1439.

*N*-((3,4-Diphenylbenzofuro[3,2-*b*]pyridin-2-yl)(2-hydroxyphenyl)methylene)-4-methoxybenzenesulfonamide (**2d**)

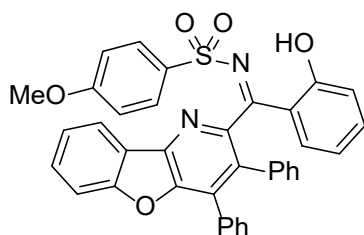

Red solid (17 mg, 56% yield); mp = 131-132 °C;

<sup>1</sup>H NMR(500 MHz, CDCl<sub>3</sub>): δ 12.03 (s, 1H), 8.20 (d, *J* = 7.5 Hz, 1H), 7.91 (d, *J* = 8.5 Hz, 2H), 7.68-7.61 (m, 2H), 7.50 (td, *J* = 8.0, 1.0 Hz, 1H), 7.42-7.39 (m, 2H), 7.35-7.31 (m, 5H), 7.26 (td, *J* = 7.5, 1.5 Hz, 2H), 7.23-7.04 (m, 3H), 6.98 (d, *J* = 8.5 Hz, 3H), 6.88 (dd, *J* = 8.5, 1.5 Hz, 1H), 6.80 (dd, *J* = 8.0, 1.0 Hz, 1H), 6.61 (td, *J* = 8.0, 1.0 Hz, 1H), 3.88 (s, 3H);

<sup>13</sup>C NMR(125 MHz, CDCl<sub>3</sub>): δ 177.6, 163.6, 162.7, 158.3, 148.5, 148.1, 142.8, 136.2, 134.8, 133.6, 133.4, 132.9, 132.0, 131.8, 131.0, 130.7, 130.3, 129.7, 128.5, 128.1, 127.8, 123.9, 123.0, 121.4, 118.9, 118.6, 118.2, 114.3, 112.6, 55.7;

IR (KBr): 3059, 2922, 1654, 1596, 1577, 1497, 1459, 1370, 1330, 1254, 1157, 1089, 1025, 979, 874, 751 cm<sup>-1</sup>;

HRMS (ESI-TOF) *m/z* [M + Na]<sup>+</sup> calcd for C<sub>37</sub>H<sub>26</sub>N<sub>2</sub>NaO<sub>5</sub>S 633.1455, found 633.1459.

*N*-((3,4-Diphenylbenzofuro[3,2-*b*]pyridin-2-yl)(2-hydroxyphenyl)methylene)-4-bromobenzenesulfonamide (**2e**)

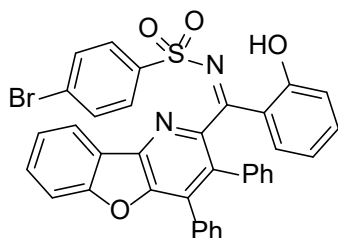

White solid (20 mg, 60% yield); mp = 253-254 °C;

<sup>1</sup>H NMR(500 MHz, CDCl<sub>3</sub>): δ 11.90 (s, 1H), 8.14 (d, *J* = 7.5 Hz, 1H), 7.84 (d, *J* = 8.5 Hz, 2H), 7.69-7.64 (m, 4H), 7.53 (t, *J* = 8.0 Hz, 1H), 7.42-7.39 (m, 2H), 7.35-7.32 (m, 3H), 7.29 (t, *J* = 8.0 Hz, 1H), 7.22-7.13 (m, 1H), 7.12-6.92 (m, 4H), 6.90 (d, *J* = 8.0 Hz, 1H), 6.82 (d, *J* = 8.0 Hz, 1H), 6.63 (t, *J* = 8.0 Hz, 1H)

<sup>13</sup>C NMR(125 MHz, CDCl<sub>3</sub>): δ 179.3, 162.9, 158.4, 148.2, 148.2, 142.8, 139.4, 136.8, 134.7, 133.7, 133.5, 133.0, 132.3, 131.8, 130.9, 130.6, 129.9, 129.5, 128.8, 128.5, 128.1, 127.9, 124.1, 122.9, 121.4, 119.1, 118.5, 118.3, 112.7;

IR (KBr): 3059, 1654, 1617, 1585, 1483, 1459, 1389, 1343, 1225, 1201, 1157, 1087, 1069, 1010, 977, 750, 696 cm<sup>-1</sup>;

HRMS (ESI-TOF) m/z [M + H]<sup>+</sup> calcd for C<sub>36</sub>H<sub>24</sub>BrN<sub>2</sub>O<sub>4</sub>S 659.0635, found 659.0635.

*N*-((3,4-Diphenylbenzofuro[3,2-*b*]pyridin-2-yl)(2-hydroxyphenyl)methylene)-3-bromobenzenesulfonamide (**2f**)

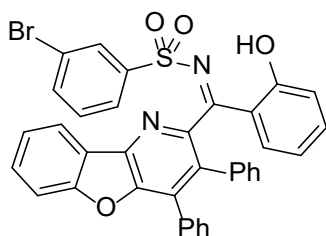

White solid (16 mg, 49% yield); mp = 188-189 °C;

<sup>1</sup>H NMR(500 MHz, CDCl<sub>3</sub>): δ 11.85 (s, 1H), 8.26 (d, *J* = 7.5 Hz, 1H), 8.19 (s, 1H), 7.95 (d, *J* = 8.0 Hz, 1H), 7.75 (d, *J* = 8.0 Hz, 1H), 7.67-7.62 (m, 2H), 7.50 (t, *J* = 7.5 Hz, 1H), 7.44-7.39 (m, 3H), 7.35-7.27 (m, 5H), 7.24-7.13 (m, 1H), 7.13-6.93 (m, 3H), 6.91 (d, *J* = 8.5 Hz, 1H), 6.83 (d, *J* = 8.5 Hz, 1H), 6.65 (t, *J* = 7.5 Hz, 1H);

<sup>13</sup>C NMR(125 MHz, CDCl<sub>3</sub>): δ 179.7, 163.0, 158.5, 148.4, 148.3, 143.1, 142.2, 137.0, 136.7, 134.9, 134.0, 133.6, 133.1, 132.0, 131.1, 131.0, 130.8, 130.7, 130.0, 128.7, 128.3, 128.1, 125.7, 124.2, 123.1, 123.0, 121.9, 119.3, 118.8, 118.5, 112.7;

IR (KBr): 3063, 1654, 1618, 1586, 1459, 1438, 1370, 1331, 1294, 1203, 1165, 1078, 978, 820, 747, 656 cm<sup>-1</sup>;

HRMS (ESI-TOF) m/z [M + H]<sup>+</sup> calcd for C<sub>36</sub>H<sub>24</sub>BrN<sub>2</sub>O<sub>4</sub>S 659.0635, found 659.0631.

*N*-((3,4-Diphenylbenzofuro[3,2-*b*]pyridin-2-yl)(2-hydroxyphenyl)methylene)-2-chlorobenzenesulfonamide (**2g**)

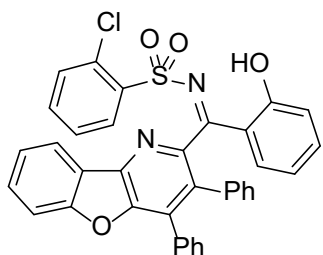

White solid (17 mg, 55% yield); mp = 113-114 °C;

**<sup>1</sup>H NMR**(500 MHz, CDCl<sub>3</sub>): δ 12.12 (s, 1H), 8.04 (d, *J* = 7.5 Hz, 1H), 7.84 (dd, *J* = 8.0, 1.5 Hz, 1H), 7.67-7.62 (m, 2H), 7.61-7.58 (m, 1H), 7.55 (td, *J* = 8.0, 1.5 Hz, 1H), 7.47 (td, *J* = 8.0, 1.0 Hz, 1H), 7.42-7.38 (m, 2H), 7.36-7.28 (m, 6H), 7.22-7.11 (m, 2H), 7.10-7.05 (m, 2H), 6.92 (dd, *J* = 8.0, 1.0 Hz, 1H), 6.85 (d, *J* = 8.0 Hz, 1H), 6.62 (t, *J* = 8.0 Hz, 1H);

**<sup>13</sup>C NMR**(125 MHz, CDCl<sub>3</sub>): δ 180.2, 163.0, 158.3, 148.4, 148.1, 142.8, 138.4, 136.9, 134.7, 134.4, 134.0, 133.4, 133.1, 132.9, 132.0, 131.9, 131.1, 130.7, 129.8, 128.5, 128.1, 127.9, 126.8, 123.9, 122.9, 121.6, 118.9, 118.4, 112.6;

**IR** (KBr): 3059, 1618, 1583, 1535, 1483, 1455, 1368, 1333, 1238, 1165, 1107, 1041, 978, 819, 749 cm<sup>-1</sup>;

**HRMS** (ESI-TOF) *m/z* [M + Na]<sup>+</sup> calcd for C<sub>36</sub>H<sub>23</sub>ClN<sub>2</sub>NaO<sub>4</sub>S 637.0959, found 637.0959.

*N*-((3,4-Diphenylbenzofuro[3,2-*b*]pyridin-2-yl)(2-hydroxyphenyl)methylene)-4-nitrobenzenesulfonamide (**2h**)

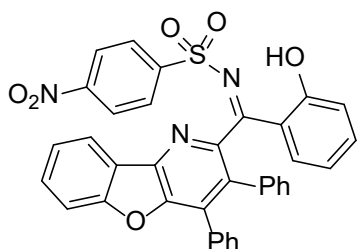

White solid (8 mg, 26% yield); mp = 256-257 °C;

**<sup>1</sup>H NMR**(500 MHz, CDCl<sub>3</sub>): δ 11.79 (s, 1H), 8.36 (d, *J* = 8.5 Hz, 2H), 8.17 (d, *J* = 8.5 Hz, 2H), 8.07 (d, *J* = 8.0 Hz, 1H), 7.69- 7.65 (m, 2H), 7.58-7.50 (m, 2H), 7.42-7.38 (m, 2H), 7.35-7.30 (m, 4H), 7.17-6.97 (m, 4H), 6.91 (dd, *J* = 8.5, 1.5 Hz, 1H), 6.84 (d,

$J = 8.5$  Hz, 1H), 6.65 (t,  $J = 8.0$  Hz, 1H);

$^{13}\text{C}$  NMR(125 MHz,  $\text{CDCl}_3$ ):  $\delta$  180.8, 163.1, 158.4, 150.4, 148.2, 148.0, 146.0, 142.9, 137.4, 134.6, 133.9, 133.6, 133.1, 131.7, 130.9, 130.6, 130.1, 129.3, 128.7, 128.2, 128.0, 124.2, 122.7, 121.2, 119.3, 118.5, 112.8;

IR (KBr): 3057, 1654, 1617, 1560, 1535, 1483, 1438, 1366, 1348, 1226, 1201, 1168, 1087, 978, 793, 758  $\text{cm}^{-1}$ ;

HRMS (ESI-TOF)  $m/z$   $[\text{M} + \text{Na}]^+$  calcd for  $\text{C}_{36}\text{H}_{23}\text{N}_3\text{NaO}_6\text{S}$  648.1200, found 648.1200.

( $\pm$ )-4-Nitro-*N*-((2*S*,3'*S*,4'*S*,*E*)-1'-((4-nitrophenyl)sulfonyl)-3',4'-diphenyl-3',4'-dihydro-1*H*,3*H*-spiro[benzofuran-2,2'-benzofuro[3,2-*b*]pyridin]-3-ylidene)benzenesulfonamide (**3h**)

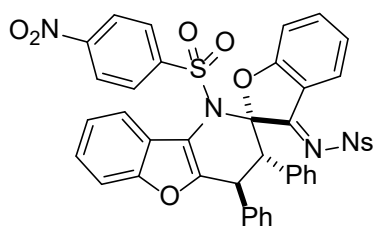

White solid (6 mg, 15% yield); mp = 158-159  $^{\circ}\text{C}$ ;

$^1\text{H}$  NMR(500 MHz,  $\text{CDCl}_3$ ):  $\delta$  8.53-8.49 (m, 3H), 8.46 (d,  $J = 8.5$  Hz, 2H), 8.10 (d,  $J = 9.0$  Hz, 2H), 7.82 (d,  $J = 9.0$  Hz, 2H), 7.43 (td,  $J = 8.0, 1.0$  Hz, 1H), 7.39 (d,  $J = 7.5$  Hz, 1H), 7.18 (td,  $J = 8.0, 1.0$  Hz, 1H), 7.13-7.08 (m, 3H), 7.05-7.00 (m, 3H), 6.99-6.93 (m, 3H), 6.86-6.83 (m, 3H), 6.56 (t,  $J = 7.5$  Hz, 1H), 6.38 (d,  $J = 8.5$  Hz, 1H), 4.72 (d,  $J = 14.0$  Hz, 1H), 4.65 (d,  $J = 14.0$  Hz, 1H);

$^{13}\text{C}$  NMR(125 MHz,  $\text{CDCl}_3$ ):  $\delta$  176.9, 174.4, 167.7, 152.4, 150.5, 150.4, 146.5, 144.4, 140.6, 131.2, 130.7, 130.2, 129.7, 129.2, 128.9, 128.7, 128.5, 128.5, 128.4, 128.2, 125.5, 124.5, 124.3, 123.8, 123.5, 123.4, 117.4, 111.4, 102.4, 59.2, 56.1;

IR (KBr): 3110, 2927, 1813, 1617, 1604, 1560, 1534, 1497, 1465, 1365, 1350, 1164, 1089, 1006, 857, 738  $\text{cm}^{-1}$

HRMS (ESI-TOF)  $m/z$   $[\text{M} + \text{Na}]^+$  calcd for  $\text{C}_{42}\text{H}_{28}\text{N}_4\text{NaO}_{10}\text{S}_2$  835.1139, found 835.1143.

*N*-((3,4-Diphenylbenzofuro[3,2-*b*]pyridin-2-yl)(2-hydroxyphenyl)methylene)-3-nitrobenzenesulfonamide (**2i**)

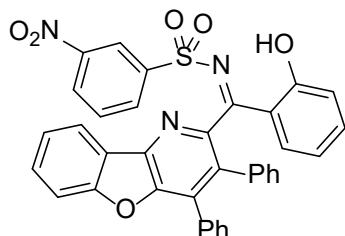

White solid (14 mg, 45% yield); mp = 243-244 °C;

<sup>1</sup>H NMR(500 MHz, CDCl<sub>3</sub>): δ 11.76 (s, 1H), 8.88 (s, 1H), 8.49 (d, *J* = 8.0 Hz, 1H), 8.35 (d, *J* = 8.0 Hz, 1H), 8.17 (d, *J* = 7.5 Hz, 1H), 7.76 (t, *J* = 8.0 Hz, 1H), 7.68-7.64 (m, 2H), 7.52 (td, *J* = 7.5, 1.5 Hz, 1H), 7.43-7.39 (m, 2H), 7.37-7.30 (m, 5H), 7.25-6.95 (m, 4H), 6.92 (dd, *J* = 8.0, 1.0 Hz, 1H), 6.83 (d, *J* = 8.0 Hz, 1H), 6.66 (td, *J* = 8.0, 1.0 Hz, 1H);

<sup>13</sup>C NMR(125 MHz, CDCl<sub>3</sub>): δ 180.6, 163.0, 158.4, 148.3, 148.2, 148.0, 143.0, 142.5, 137.3, 134.6, 133.9, 133.5, 133.4, 133.1, 131.7, 130.9, 130.6, 130.5, 130.4, 130.1, 128.6, 128.2, 128.0, 127.9, 124.1, 123.4, 122.7, 121.5, 119.3, 118.6, 118.5, 112.6;

IR (KBr): 3061, 1597, 1581, 1537, 1477, 1459, 1366, 1351, 1314, 1158, 1129, 1064, 870, 831, 754 cm<sup>-1</sup>;

HRMS (ESI-TOF) *m/z* [M + Na]<sup>+</sup> calcd for C<sub>36</sub>H<sub>23</sub>N<sub>3</sub>NaO<sub>6</sub>S 648.1200, found 648.1198.

*N*-((3,4-Diphenylbenzofuro[3,2-*b*]pyridin-2-yl)(2-hydroxyphenyl)methylene)-2-nitrobenzenesulfonamide (**2j**)

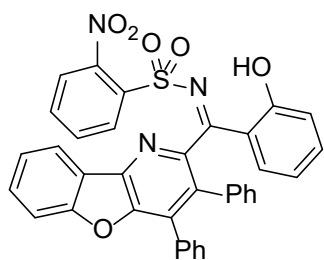

White solid (13 mg, 42% yield); mp = 135-136 °C;

<sup>1</sup>H NMR(500 MHz, CDCl<sub>3</sub>): δ 12.07 (s, 1H), 8.14 (d, *J* = 7.5 Hz, 1H), 7.99 (dd, *J* =

7.5, 1.0 Hz, 1H), 7.80-7.73 (m, 2H), 7.69-7.61 (m, 3H), 7.60-7.43 (m, 2H), 7.43-7.38 (m, 2H), 7.36-7.30 (m, 4H), 7.22-7.00 (m, 4H), 6.94 (dd,  $J = 8.5, 1.5$  Hz, 1H), 6.89 (d,  $J = 8.5$  Hz, 1H), 6.63 (td,  $J = 7.5, 1.0$  Hz, 1H);

$^{13}\text{C}$  NMR(125 MHz,  $\text{CDCl}_3$ ): 180.3, 163.4, 158.4, 148.6, 148.4, 148.2, 142.8, 137.3, 134.6, 134.4, 134.1, 133.6, 133.5, 133.1, 132.0, 131.8, 131.4, 131.0, 130.6, 129.9, 128.6, 128.3, 128.2, 128.0, 124.6, 124.0, 122.9, 121.3, 119.0, 118.8, 118.4, 112.7;

IR (KBr): 3058, 1618, 1578, 1541, 1529, 1483, 1438, 1365, 1333, 1298, 1220, 1158, 1124, 1055, 978, 749  $\text{cm}^{-1}$ ;

HRMS (ESI-TOF)  $m/z$   $[\text{M} + \text{Na}]^+$  calcd for  $\text{C}_{36}\text{H}_{23}\text{N}_3\text{NaO}_6\text{S}$  648.1200, found 648.1199.

*N*-((3,4-Bis(4-bromophenyl)benzofuro[3,2-*b*]pyridin-2-yl)(2-hydroxyphenyl)-methylene)-4-methylbenzenesulfonamide (**2k**)

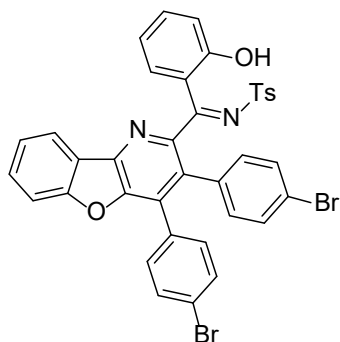

White solid (19 mg, 55% yield); mp = 239-240  $^{\circ}\text{C}$ ;

$^1\text{H}$  NMR(500 MHz,  $\text{CDCl}_3$ ):  $\delta$  12.0 (s, 1H), 8.65 (d,  $J = 8.0$  Hz, 1H), 8.18 (d,  $J = 8.0$  Hz, 1H), 7.92 (d,  $J = 8.0$  Hz, 2H), 7.84 (d,  $J = 8.5$  Hz, 1H), 7.67-7.62 (m, 3H), 7.50 (d,  $J = 8.0$  Hz, 2H), 7.33 (d,  $J = 8.0$  Hz, 2H), 7.25-7.24 (m, 2H), 7.16 (d,  $J = 8.0$  Hz, 2H), 6.88-6.82 (m, 4H), 6.63 (t,  $J = 8.0$  Hz, 1H), 2.48 (s, 3H).

$^{13}\text{C}$  NMR(125 MHz,  $\text{CDCl}_3$ ):  $\delta$  162.9, 158.4, 148.3, 147.7, 144.7, 143.9, 143.3, 137.1, 136.7, 133.5, 133.3, 132.1, 131.6, 131.5, 130.9, 130.1, 129.8, 129.7, 128.0, 127.1, 124.2, 123.3, 122.8, 122.7, 122.4, 121.6, 119.1, 118.5, 118.4, 112.6, 21.7;

IR (KBr): 3071, 2924, 1654, 1617, 1597, 1478, 1459, 1370, 1334, 1202, 1159, 1012, 872, 822, 750  $\text{cm}^{-1}$ ;

**HRMS** (ESI-TOF)  $m/z$   $[M + H]^+$  calcd for  $C_{37}H_{25}Br_2N_2O_4S$  750.9896, found 750.9895.

(±)-*N*-((2*S*,3'*S*,4'*S*,*E*)-3',4'-Bis(4-bromophenyl)-1'-tosyl-3',4'-dihydro-1'*H*,3*H*-spiro[benzofuran-2,2'-benzofuro[3,2-*b*]pyridin]-3-ylidene)-4-methylbenzenesulfonamide (**3k**)

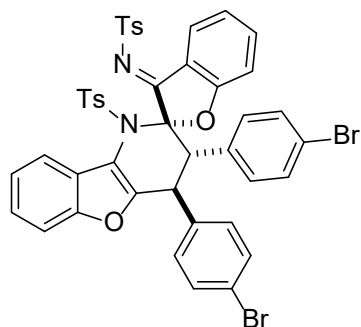

White solid (11 mg, 24% yield); mp = 87-88 °C;

**<sup>1</sup>H NMR**(500 MHz,  $CDCl_3$ ):  $\delta$  8.31 (s, 1H), 8.16 (s, 1H), 7.94-7.90 (m, 2H), 7.57-7.51 (m, 3H), 7.36 (d,  $J = 8.0$  Hz, 2H), 7.30-7.27 (m, 2H), 7.25-7.20 (m, 3H), 7.19-7.14 (m, 1H), 7.09 (d,  $J = 8.0$  Hz, 2H), 7.03-6.97 (m, 3H), 6.92 (d,  $J = 8.5$  Hz, 1H), 6.86 (d,  $J = 8.5$  Hz, 1H), 6.67 (d,  $J = 8.0$  Hz, 2H), 4.67 (d,  $J = 12.0$  Hz, 1H), 3.48 (d,  $J = 12.0$  Hz, 1H), 2.47 (s, 3H), 2.38 (s, 3H);

**<sup>13</sup>C NMR**(125 MHz,  $CDCl_3$ ):  $\delta$  177.4, 170.2, 168.0, 153.9, 144.2, 143.8, 138.1, 138.0, 135.8, 135.2, 131.6, 131.3, 131.2, 130.6, 130.5, 129.6, 129.5, 129.3, 128.1, 127.4, 125.9, 124.7, 123.3, 123.1, 122.9, 122.8, 122.5, 122.1, 121.5, 118.1, 111.5, 111.1, 99.6, 42.5, 31.6, 21.7, 21.6;

**IR** (KBr): 3061, 2922, 1654, 1617, 1598, 1560, 1494, 1452, 1325, 1186, 1163, 1091, 880, 814, 750, 704  $cm^{-1}$ ;

**HRMS** (ESI-TOF)  $m/z$   $[M + Na]^+$  calcd for  $C_{44}H_{32}Br_2N_2NaO_6S_2$  928.9961, found 928.9962.

*N*-((3,4-Bis(4-methoxyphenyl)benzofuro[3,2-*b*]pyridin-2-yl)(2-hydroxyphenyl)methylene)-4-methylbenzenesulfonamide (**2l**)

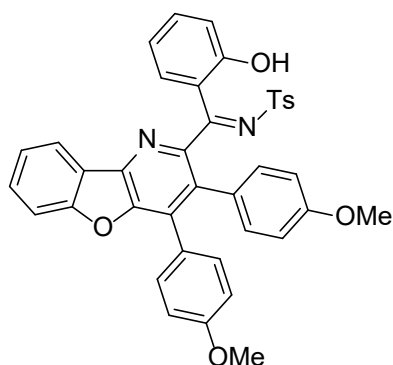

White solid (10 mg, 30% yield); mp = 87-88 °C.

$^1\text{H NMR}$ (500 MHz,  $\text{CDCl}_3$ ):  $\delta$  12.08 (s, 1H), 8.15 (d,  $J = 8.0$  Hz, 1H), 7.86 (d,  $J = 8.5$  Hz, 2H), 7.67-7.60 (m, 2H), 7.49 (t,  $J = 7.5$  Hz, 1H), 7.35 (d,  $J = 8.5$  Hz, 2H), 7.31 (d,  $J = 8.0$  Hz, 2H), 7.29-7.27 (m, 1H), 7.25-7.21 (m, 1H), 7.21-7.02 (m, 2H), 7.01-6.95 (m, 1H), 6.89-6.84 (m, 2H), 6.82 (d,  $J = 8.0$  Hz, 1H), 6.71-7.64 (m, 1H), 6.60 (t,  $J = 8.0$  Hz, 1H), 3.82 (s, 3H), 3.70 (s, 3H), 2.43 (s, 3H);

$^{13}\text{C NMR}$ (125 MHz,  $\text{CDCl}_3$ ):  $\delta$  162.9, 159.6, 159.0, 158.2, 151.4, 148.6, 147.0, 144.5, 142.5, 139.4, 137.3, 136.3, 135.1, 133.6, 132.1, 129.7, 129.6, 129.5, 128.1, 127.9, 127.2, 124.1, 123.8, 123.2, 121.4, 118.9, 118.5, 118.3, 114.7, 113.7, 112.5, 110.0, 55.2, 55.1, 21.7;

**IR** (KBr): 3071, 2931, 1654, 1611, 1513, 1459, 1366, 1332, 1294, 1251, 1201, 1162, 1088, 1031, 978, 754  $\text{cm}^{-1}$ ;

**HRMS** (ESI-TOF)  $m/z$   $[\text{M} + \text{H}]^+$  calcd for  $\text{C}_{39}\text{H}_{31}\text{N}_2\text{O}_6\text{S}$  655.1897, found, 655.1985.

( $\pm$ )-*N*-((2*S*,3'*S*,4'*S*,*E*)-3',4'-Bis(4-methoxyphenyl)-1'-tosyl-3',4'-dihydro-1'*H*,3*H*-spiro[benzofuran-2,2'-benzofuro[3,2-*b*]pyridin]-3-ylidene)-4-methylbenzenesulfonamide (**31**)

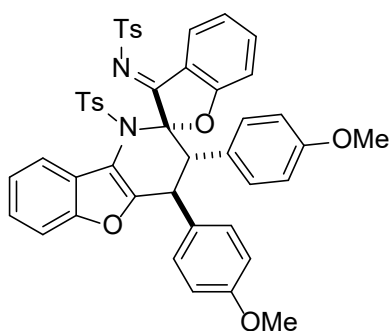

White solid (6 mg, 15% yield); mp = 140-141 °C.

**<sup>1</sup>H NMR**(500 MHz, CDCl<sub>3</sub>): δ 8.28 (s, 1H), 8.16 (s, 1H), 7.98-7.92 (m, 2H), 7.55 (d, *J* = 7.5 Hz, 2H), 7.49 (t, *J* = 8.0 Hz, 1H), 7.36 (d, *J* = 8.0 Hz, 2H), 7.30-7.28 (m, 1H), 7.25-7.16 (m, 3H), 7.08 (d, *J* = 8.0 Hz, 2H), 6.96 (t, *J* = 8.0 Hz, 1H), 6.92 (d, *J* = 8.0 Hz, 2H), 6.75 (d, *J* = 8.0 Hz, 2H), 6.61 (d, *J* = 8.0 Hz, 2H), 6.41 (d, *J* = 8.0 Hz, 2H), 4.69 (d, *J* = 11.5 Hz, 1H), 3.68 (s, 3H), 3.58 (s, 3H), 2.46 (s, 3H), 2.37 (s, 3H);

**<sup>13</sup>C NMR**(125 MHz, CDCl<sub>3</sub>): δ 178.4, 158.7, 158.5, 153.8, 143.9, 143.5, 143.3, 139.2, 138.6, 138.3, 137.7, 136.1, 130.3, 130.0, 129.5, 129.4, 129.3, 128.4, 128.0, 127.4, 125.8, 124.3, 124.0, 122.9, 122.8, 122.7, 122.4, 117.6, 113.8, 113.6, 111.4, 100.2, 55.0, 54.9, 42.1, 31.6, 22.6, 21.6;

**IR** (KBr): 3035, 2923, 1654, 1605, 1546, 1513, 1461, 1324, 1253, 1181, 1159, 1089, 1032, 874, 828, 749 cm<sup>-1</sup>;

**HRMS** (ESI-TOF) *m/z* [M + Na]<sup>+</sup> calcd for C<sub>46</sub>H<sub>38</sub>N<sub>2</sub>NaO<sub>8</sub>S<sub>2</sub> 833.1962, found 833.1962.

*N*-((3,4-Bis(3-bromophenyl)benzofuro[3,2-*b*]pyridin-2-yl)(2-hydroxyphenyl)-methylene)-4-methylbenzenesulfonamide (**2m**)

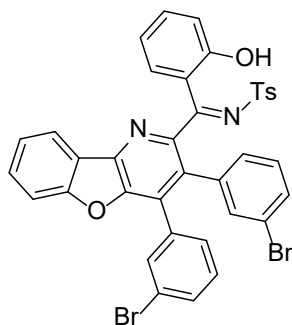

White solid (20 mg, 53% yield); mp = 145-146 °C.

**<sup>1</sup>H NMR**(500 MHz, CDCl<sub>3</sub>): δ 11.82 (s, 1H), 8.23 (d, *J* = 6.5 Hz, 1H), 7.89 (d, *J* = 6.5 Hz, 2H), 7.70-7.65 (m, 2H), 7.63 (s, 1H), 7.53 (td, *J* = 8.0, 1.5 Hz, 1H), 7.51-7.44 (m, 2H), 7.41 (td, *J* = 8.0, 1.5 Hz, 1H), 7.36-7.28 (m, 4H), 7.25-7.19 (m, 3H), 7.03-7.00 (m, 1H), 6.87-6.82 (m, 2H), 6.67 (t, *J* = 7.5 Hz, 1H), 2.45 (s, 3H).

**<sup>13</sup>C NMR**(125 MHz, CDCl<sub>3</sub>): δ 162.6, 158.4, 148.5, 147.6, 144.7, 138.5, 137.2, 136.5, 133.8, 133.5, 133.3, 133.2, 132.5, 132.3, 131.8, 131.7, 131.2, 131.1, 131.0, 130.2,

129.8, 129.2, 127.9, 124.2, 122.8, 122.3, 121.7, 119.1, 118.4, 112.8, 112.7, 110.0, 21.7;  
**IR** (KBr): 3067, 2923, 1654, 1596, 1477, 1460, 1366, 1326, 1303, 1201, 1160, 1088,  
1032, 820, 753  $\text{cm}^{-1}$ ;  
**HRMS** (ESI-TOF)  $m/z$   $[M + H]^+$  calcd for  $\text{C}_{37}\text{H}_{25}\text{Br}_2\text{N}_2\text{O}_4\text{S}$  750.9896, found  
750.9897.

*N*-((3,4-Bis(3-methoxyphenyl)benzofuro[3,2-*b*]pyridin-2-yl)(2-hydroxyphenyl)-  
methylene)-4-methylbenzenesulfonamide (**2n**)

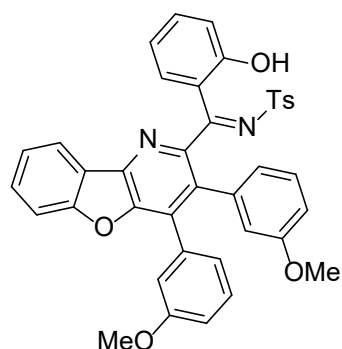

White solid (12 mg, 37% yield); mp = 208-209  $^{\circ}\text{C}$ ;

**$^1\text{H}$  NMR**(500 MHz,  $\text{CDCl}_3$ ):  $\delta$  12.0 (s, 1H), 8.18 (d,  $J = 8.0$  Hz, 1H), 7.88 (d,  $J = 8.0$  Hz, 2H), 7.70 (d,  $J = 8.0$  Hz, 1H), 7.64 (td,  $J = 8.0, 1.0$  Hz, 1H), 7.51 (td,  $J = 8.0, 1.0$  Hz, 1H), 7.32 (d,  $J = 8.0$  Hz, 2H), 7.30-7.27 (m, 3H), 7.18-6.98 (m, 3H), 6.92-6.87 (m, 3H), 6.82 (d,  $J = 8.0$  Hz, 1H), 6.66-6.60 (m, 2H), 3.66 (s, 6H), 2.44 (s, 3H).

**$^{13}\text{C}$  NMR**(125 MHz,  $\text{CDCl}_3$ ):  $\delta$  162.7, 159.1, 158.3, 148.3, 148.0, 144.6, 142.9, 137.2, 136.4, 136.1, 134.5, 133.7, 133.2, 133.1, 132.6, 132.2, 129.8, 129.7, 129.2, 128.1, 123.9, 123.0, 123.0, 121.4, 118.9, 118.2, 115.7, 115.5, 114.9, 114.8, 112.6, 55.2, 21.7;

**IR** (KBr): 3071, 2927, 1654, 1617, 1584, 1492, 1420, 1366, 1330, 1294, 1222, 1163, 1087, 1087, 1040, 753  $\text{cm}^{-1}$ ;

**HRMS** (ESI-TOF)  $m/z$   $[M + \text{Na}]^+$  calcd for  $\text{C}_{39}\text{H}_{30}\text{N}_2\text{NaO}_6\text{S}$  677.1717, found  
677.1716.

*N*-((3,4-Bis(2-bromophenyl)benzofuro[3,2-*b*]pyridin-2-yl)(2-hydroxyphenyl)-  
methylene)-4-methylbenzenesulfonamide (**2o**)

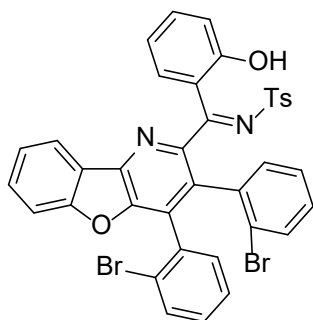

White solid (10 mg, 26% yield); mp = 138-139 °C.

<sup>1</sup>H NMR(500 MHz, CDCl<sub>3</sub>): δ 11.87 (s, 1H), 8.20 (d, *J* = 7.5 Hz, 1H), 8.08 (dd, *J* = 7.5, 1.0 Hz, 1H), 7.91 (d, *J* = 8.5 Hz, 2H), 7.75 (d, *J* = 8.0 Hz, 1H), 7.71 (d, *J* = 8.5 Hz, 1H), 7.67 (t, *J* = 8.0 Hz, 1H), 7.54 (t, *J* = 7.5 Hz, 1H), 7.37-7.33 (m, 3H), 7.31 (d, *J* = 8.0 Hz, 1H), 7.30-7.27 (m, 2H), 7.20 (t, *J* = 8.0 Hz, 1H), 7.11 (d, *J* = 7.5 Hz, 1H), 7.06 (t, *J* = 7.5 Hz, 1H), 6.99-6.94 (m, 2H), 6.77 (d, *J* = 8.5 Hz, 1H), 6.70 (t, *J* = 8.0 Hz, 1H), 2.48 (s, 3H);

<sup>13</sup>C NMR(125 MHz, CDCl<sub>3</sub>): δ 178.0, 162.2, 158.4, 148.4, 147.5, 144.7, 143.4, 137.2, 136.7, 134.9, 134.6, 133.8, 133.5, 133.1, 132.9, 132.8, 132.2, 131.5, 130.2, 130.0, 129.8, 129.7, 128.2, 127.0, 125.4, 125.0, 124.5, 124.0, 122.8, 121.4, 119.2, 118.2, 117.6, 112.8, 110.0, 21.7;

IR (KBr): 3067, 2924, 1654, 1585, 1560, 1492, 1438, 1333, 1293, 1200, 1159, 1088, 1029, 978, 876, 751 cm<sup>-1</sup>;

HRMS (ESI-TOF) *m/z* [M + Na]<sup>+</sup> calcd for C<sub>37</sub>H<sub>24</sub>Br<sub>2</sub>N<sub>2</sub>NaO<sub>4</sub>S 772.9716, found 772.9716.

*N*-((5-Bromo-2-hydroxyphenyl)(8-bromo-3,4-diphenylbenzofuro[3,2-*b*]pyridin-2-yl)methylene)-4-methylbenzenesulfonamide (**2q**)

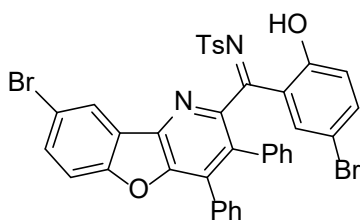

White solid (21 mg, 56% yield); mp = 99-100 °C;

<sup>1</sup>H NMR(500 MHz, CDCl<sub>3</sub>): δ 12.01 (s, 1H), 8.24 (d, *J* = 2.0 Hz, 1H), 7.83 (d, *J* = 8.5

Hz, 1H), 7.74 (dd,  $J = 9.0, 2.0$  Hz, 1H), 7.56 (d,  $J = 8.5$  Hz, 1H), 7.42-7.39 (m, 2H), 7.37-7.32 (m, 6H), 7.30 (dd,  $J = 9.0, 2.0$  Hz, 1H), 7.24-7.18 (m, 1H), 7.16-7.05 (m, 3H), 6.91 (d,  $J = 2.0$  Hz, 1H), 6.70 (d,  $J = 9.0$  Hz, 1H), 2.50 (s, 3H);

$^{13}\text{C NMR}$ (125 MHz,  $\text{CDCl}_3$ ):  $\delta$  177.3, 161.5, 157.0, 148.8, 148.1, 144.9, 141.8, 138.7, 137.1, 135.0, 134.6, 134.1, 133.3, 132.7, 131.4, 130.8, 130.6, 129.8, 128.8, 128.2, 128.1, 128.0, 124.8, 124.5, 120.2, 119.4, 117.0, 114.2, 110.5, 21.8;

**IR** (KBr): 3059, 2924, 1654, 1577, 1560, 1541, 1458, 1336, 1278, 1199, 1163, 1085, 984, 922, 854, 726  $\text{cm}^{-1}$ ;

**HRMS** (ESI-TOF)  $m/z$   $[\text{M} + \text{Na}]^+$  calcd for  $\text{C}_{37}\text{H}_{24}\text{Br}_2\text{N}_2\text{NaO}_4\text{S}$  772.9716, found 772.9721.

*N*-((2-Hydroxy-4-methoxyphenyl)(7-methoxy-3,4-diphenylbenzofuro[3,2-*b*]pyridin-2-yl)methylene)-4-methylbenzenesulfonamide (**2r**)

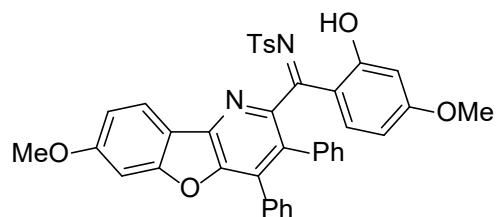

White solid (10 mg, 31% yield); mp = 109-110  $^{\circ}\text{C}$ ;

$^1\text{H NMR}$ (500 MHz,  $\text{CDCl}_3$ ):  $\delta$  12.61 (s, 1H), 8.00 (d,  $J = 9.0$  Hz, 1H), 7.83 (d,  $J = 8.0$  Hz, 2H), 7.53 (d,  $J = 8.0$  Hz, 1H), 7.38-7.36 (m, 2H), 7.32-7.29 (m, 4H), 7.28 (s, 1H), 7.15-7.11 (m, 2H), 7.10-7.03 (m, 3H), 6.79 (d,  $J = 9.0$  Hz, 1H), 6.75-6.71 (m, 1H), 6.25 (d,  $J = 2.5$  Hz, 1H), 6.18 (dd,  $J = 9.0, 2.5$  Hz, 1H), 3.93 (s, 3H), 3.74 (s, 3H), 2.43 (s, 3H);

$^{13}\text{C NMR}$ (125 MHz,  $\text{CDCl}_3$ ):  $\delta$  166.5, 166.0, 161.9, 160.0, 148.2, 144.0, 143.0, 138.0, 135.4, 135.1, 130.6, 129.5, 128.3, 128.0, 127.9, 127.7, 121.9, 115.9, 112.8, 112.3, 108.5, 100.6, 96.8, 55.9, 55.6, 21.7;

**IR** (KBr): 3057, 2923, 1630, 1597, 1508, 1497, 1370, 1332, 1277, 1247, 1161, 1120, 1088, 1023, 980, 825  $\text{cm}^{-1}$ ;

**HRMS** (ESI-TOF)  $m/z$   $[\text{M} + \text{H}]^+$  calcd for  $\text{C}_{39}\text{H}_{31}\text{N}_2\text{O}_6\text{S}$  655.1897, found 655.1897.

*N*-((3,4-Diphenylbenzofuro[3,2-*b*]pyridin-2-yl)(2-hydroxyphenyl)methyl)-4-methylbenzenesulfonamide (**4**)

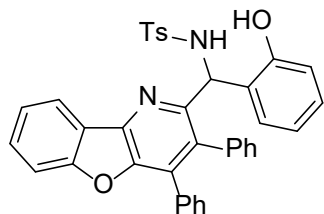

White solid (42 mg, 71% yield); mp = 127-128 °C.

**<sup>1</sup>H NMR**(500 MHz, CDCl<sub>3</sub>) δ 11.61 (s, 1H), 8.15 (d, *J* = 7.5 Hz, 1H), 7.61 (td, *J* = 7.5, 1.0 Hz, 1H), 7.55 (d, *J* = 8.0 Hz, 1H), 7.50 (td, *J* = 7.5, 1.0 Hz, 1H), 7.46-7.42 (m, 2H), 7.40-7.36 (m, 1H), 7.35 (d, *J* = 8.0 Hz, 2H), 7.32-7.27 (m, 4H), 7.21-7.17 (m, 2H), 7.07 (td, *J* = 8.0, 1.5 Hz, 1H), 6.90 (d, *J* = 8.0 Hz, 1H), 6.85 (d, *J* = 8.0 Hz, 2H), 6.82 (dd, *J* = 8.0, 1.0 Hz, 1H), 6.61 (td, *J* = 7.5, 1.0 Hz, 1H), 6.41 (dd, *J* = 7.5, 1.5 Hz, 1H), 6.31 (d, *J* = 8.0 Hz, 1H), 5.61 (*J* = 8.0 Hz, 1H), 2.01 (s, 3H).

**<sup>13</sup>C NMR**(125 MHz, CDCl<sub>3</sub>) δ 158.1, 155.6, 152.6, 147.3, 142.6, 141.6, 137.3, 135.2, 134.6, 133.5, 132.2, 131.3, 131.0, 130.1, 130.0, 129.9, 129.9, 128.8, 128.6, 128.5, 128.2, 128.1, 127.9, 125.6, 124.9, 124.0, 121.8, 121.5, 120.1, 119.5, 112.5, 60.1, 21.0.

**HRMS** (ESI-TOF) calcd for C<sub>37</sub>H<sub>29</sub>N<sub>2</sub>O<sub>4</sub>S<sup>+</sup> ([M+H]<sup>+</sup>): 597.1843; found: 597.1843.

**IR** (film): 3415, 3060, 2925, 2855, 1630, 1593, 1485, 1370, 1342, 1252, 1201, 1162, 1093, 1054, 812, 753 cm<sup>-1</sup>.

## 5. Copies of NMR spectra of products 2, 3 and 4

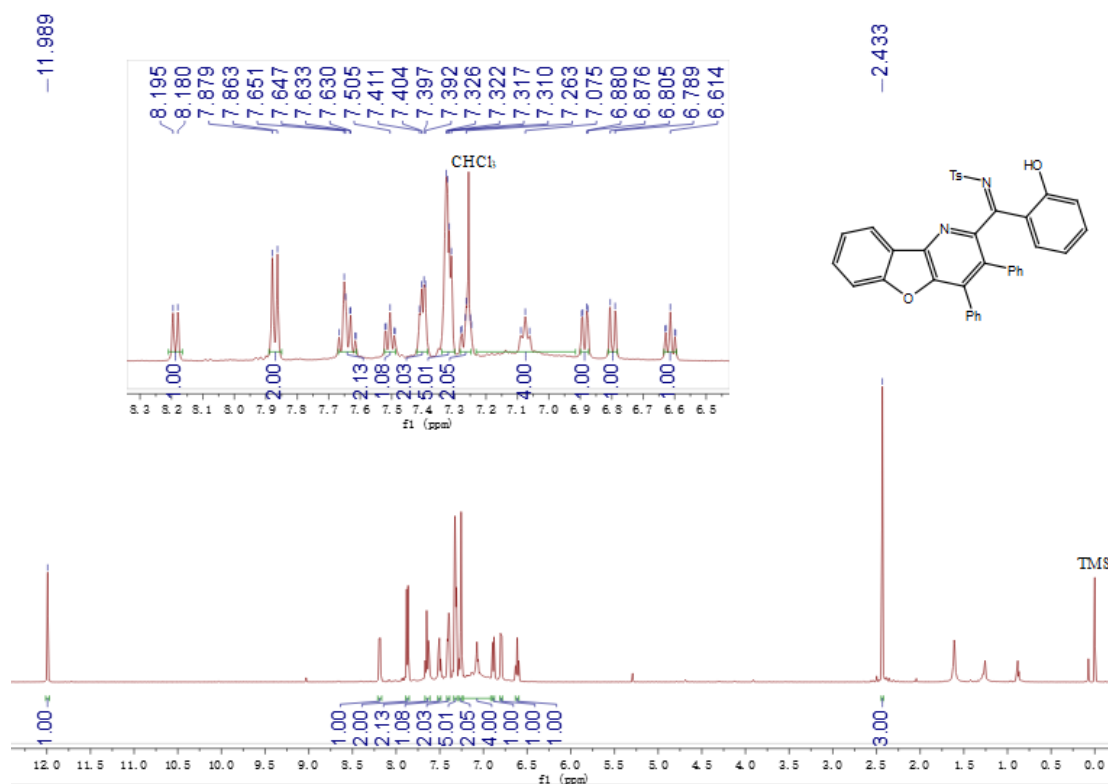

<sup>1</sup>H NMR of **2a** (500 MHz, CDCl<sub>3</sub>)

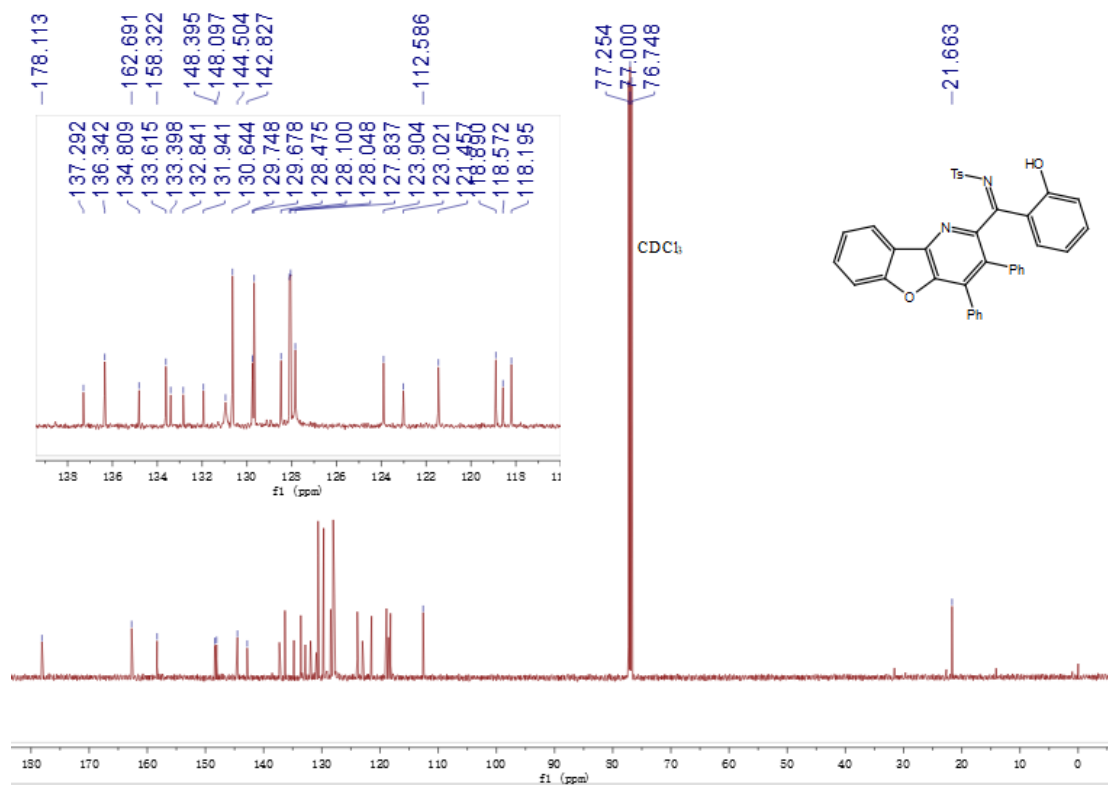

<sup>13</sup>C {<sup>1</sup>H} NMR of **2a** (125 MHz, CDCl<sub>3</sub>)

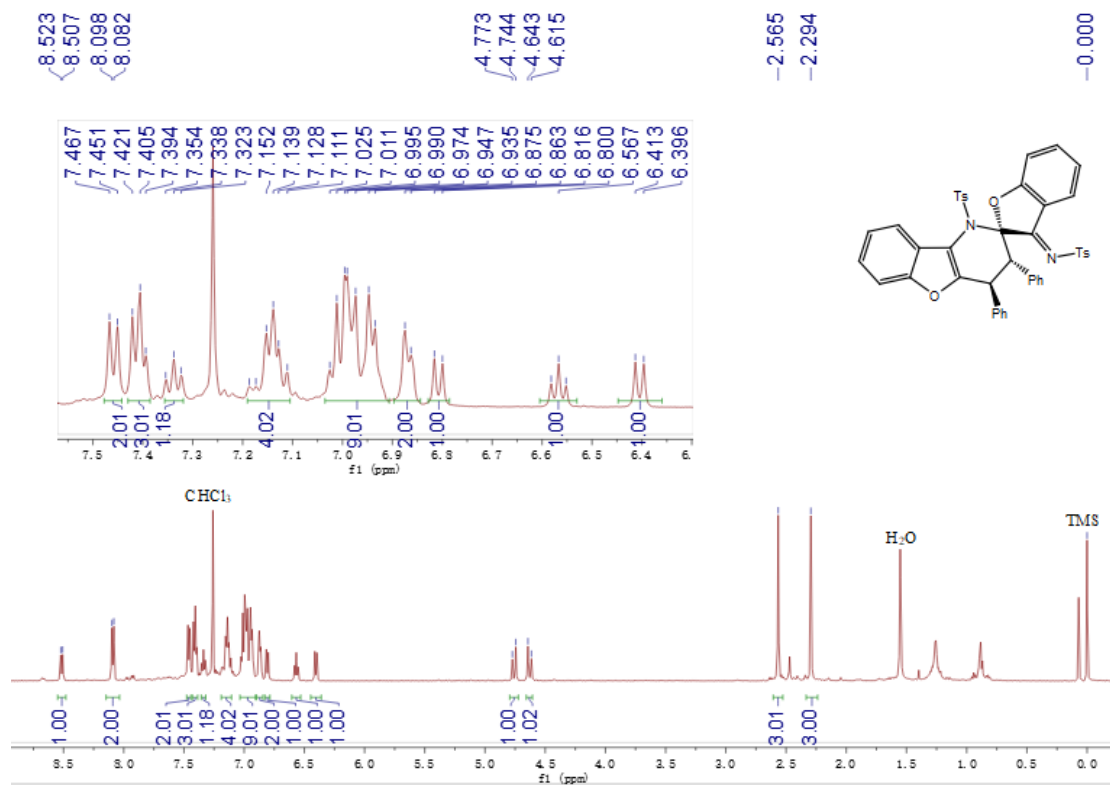

$^1\text{H}$  NMR of **3a** (500 MHz,  $\text{CDCl}_3$ )

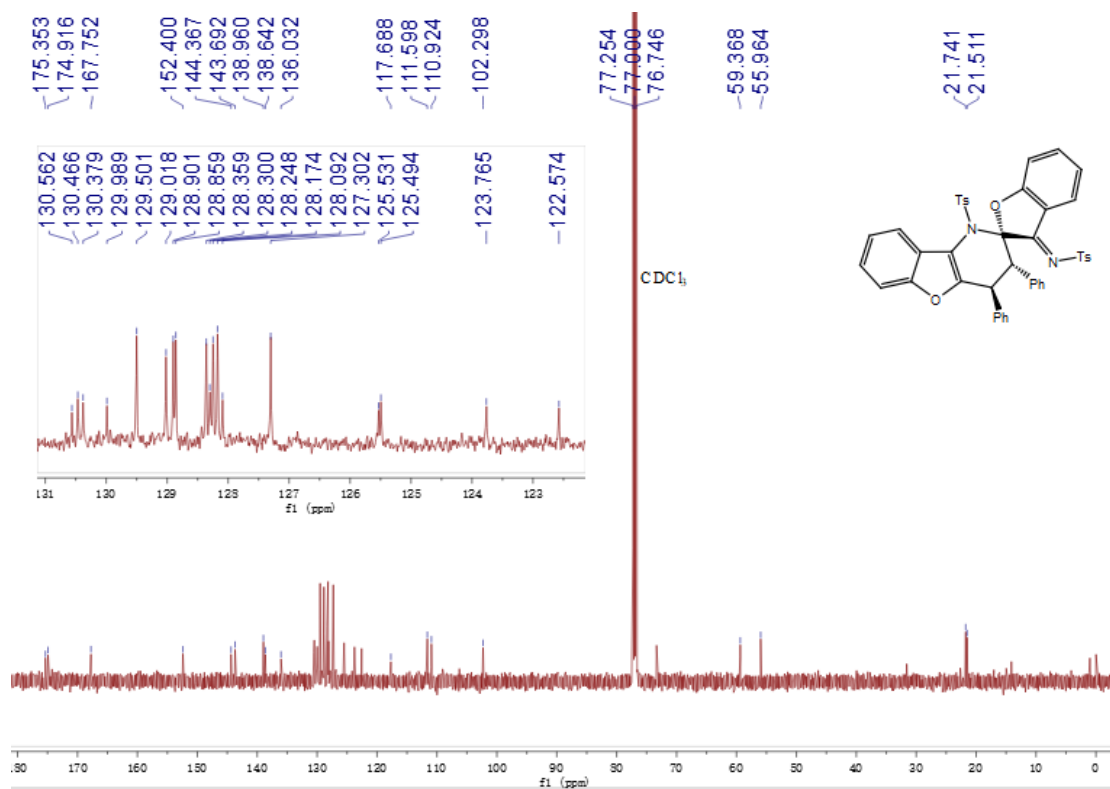

$^{13}\text{C}\{^1\text{H}\}$  NMR of **3a** (125 MHz,  $\text{CDCl}_3$ )

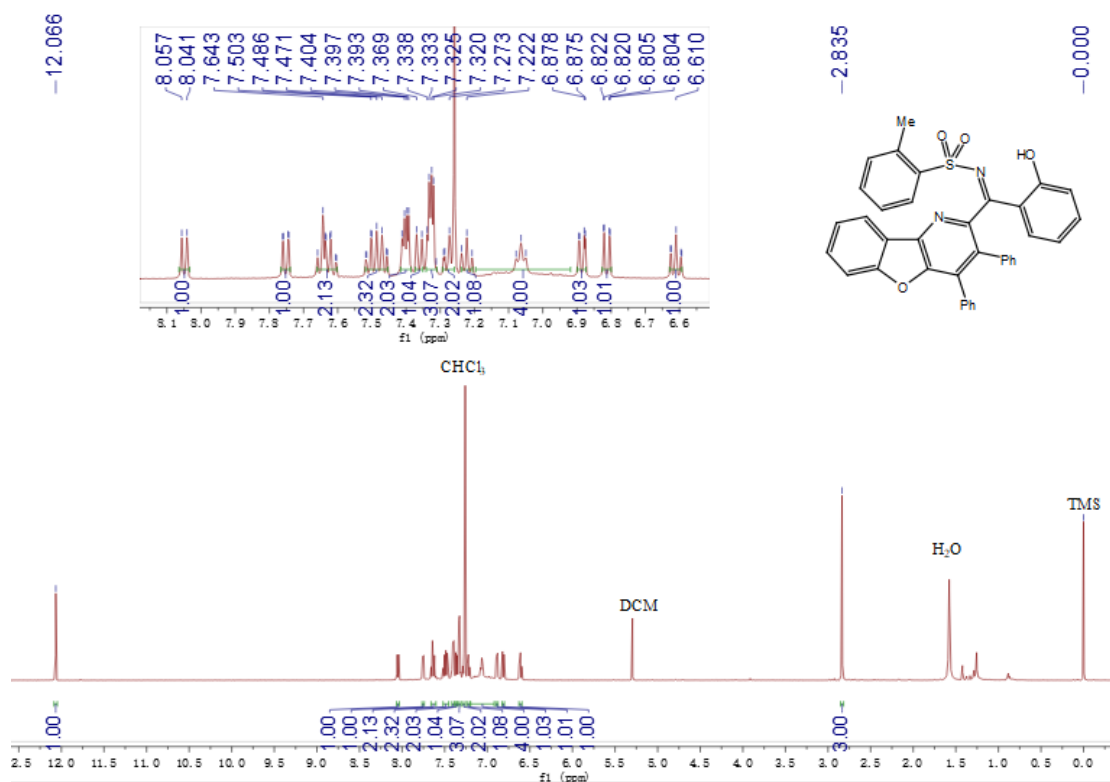

<sup>1</sup>H NMR of **2b** (500 MHz, CDCl<sub>3</sub>)

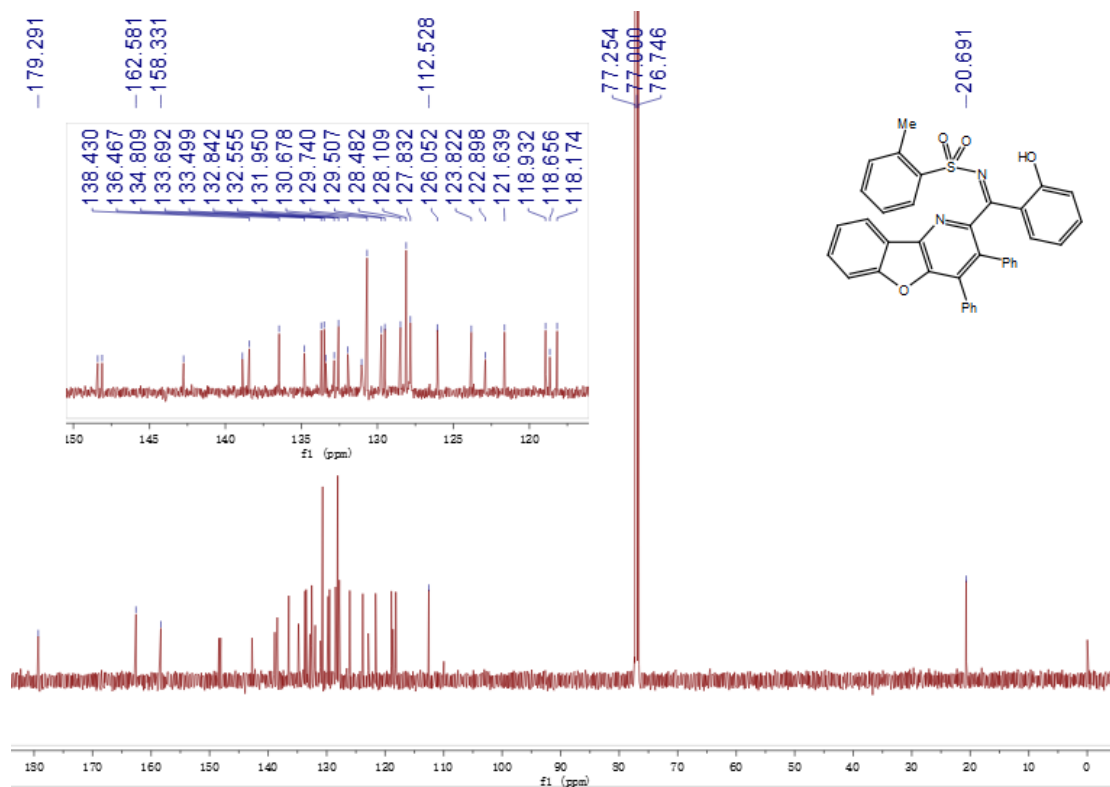

<sup>13</sup>C{<sup>1</sup>H} NMR of **2b** (125 MHz, CDCl<sub>3</sub>)

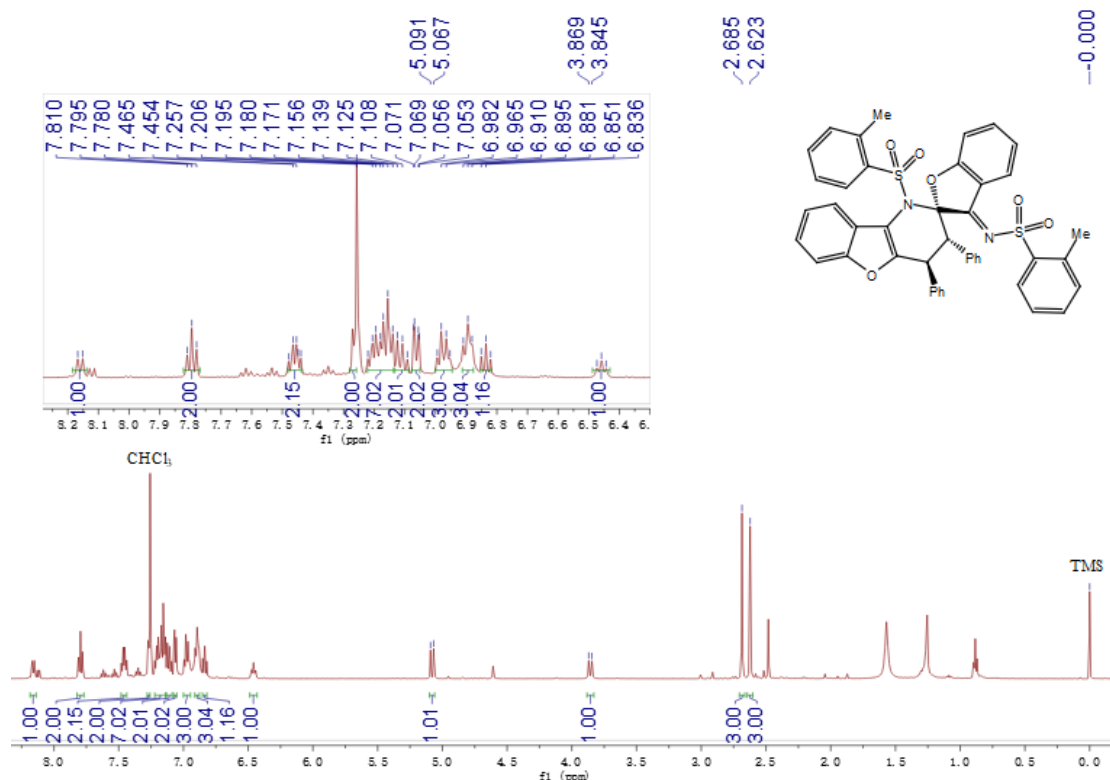

<sup>1</sup>H NMR of **3b** (500 MHz, CDCl<sub>3</sub>)

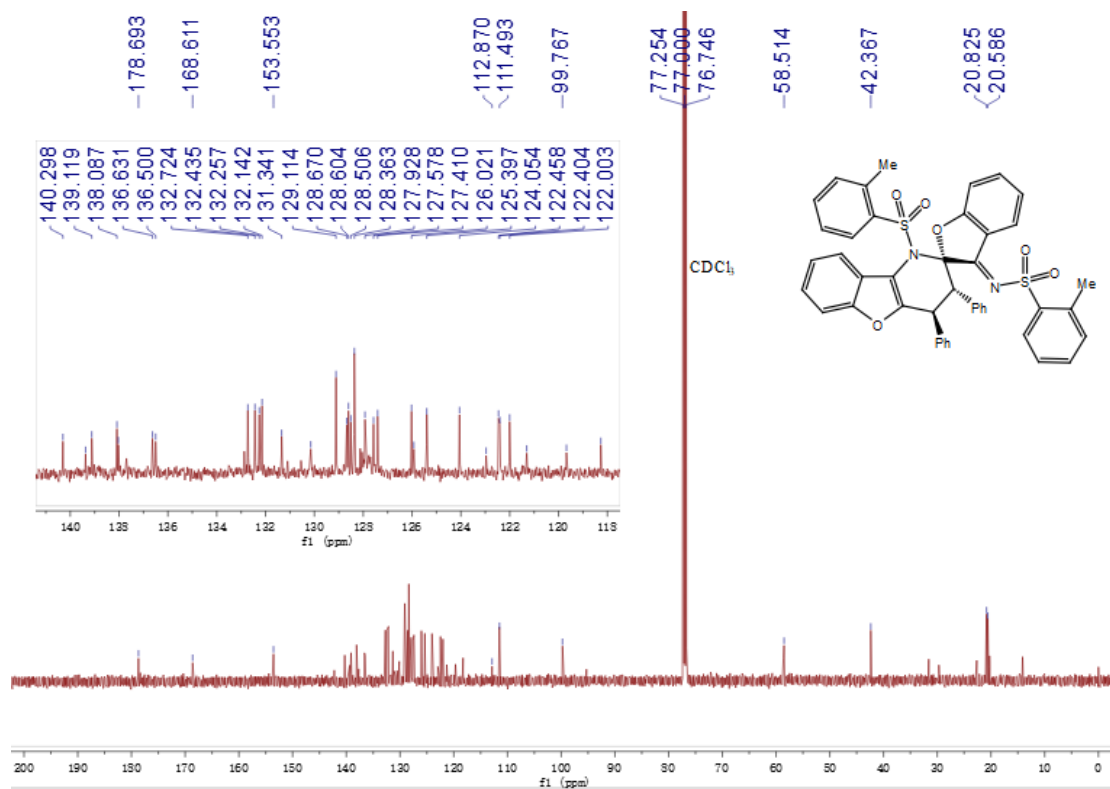

<sup>13</sup>C {<sup>1</sup>H} NMR of **3b** (125 MHz, CDCl<sub>3</sub>)

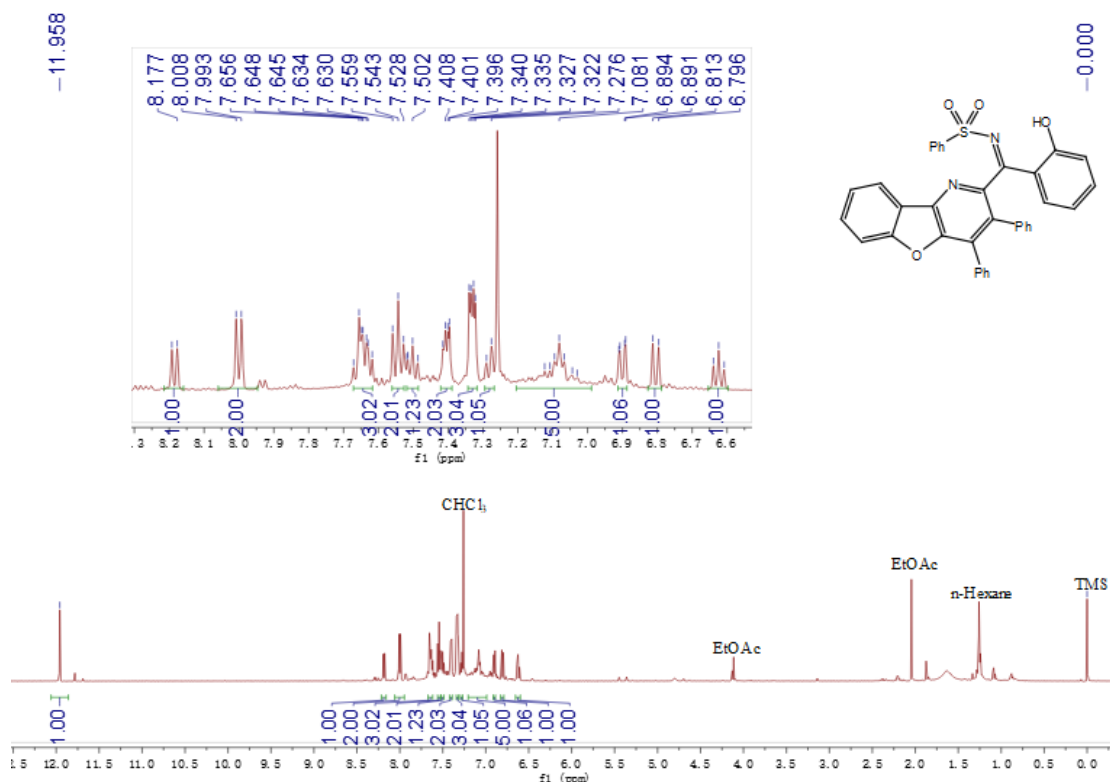

<sup>1</sup>H NMR of **2c** (500 MHz, CDCl<sub>3</sub>)

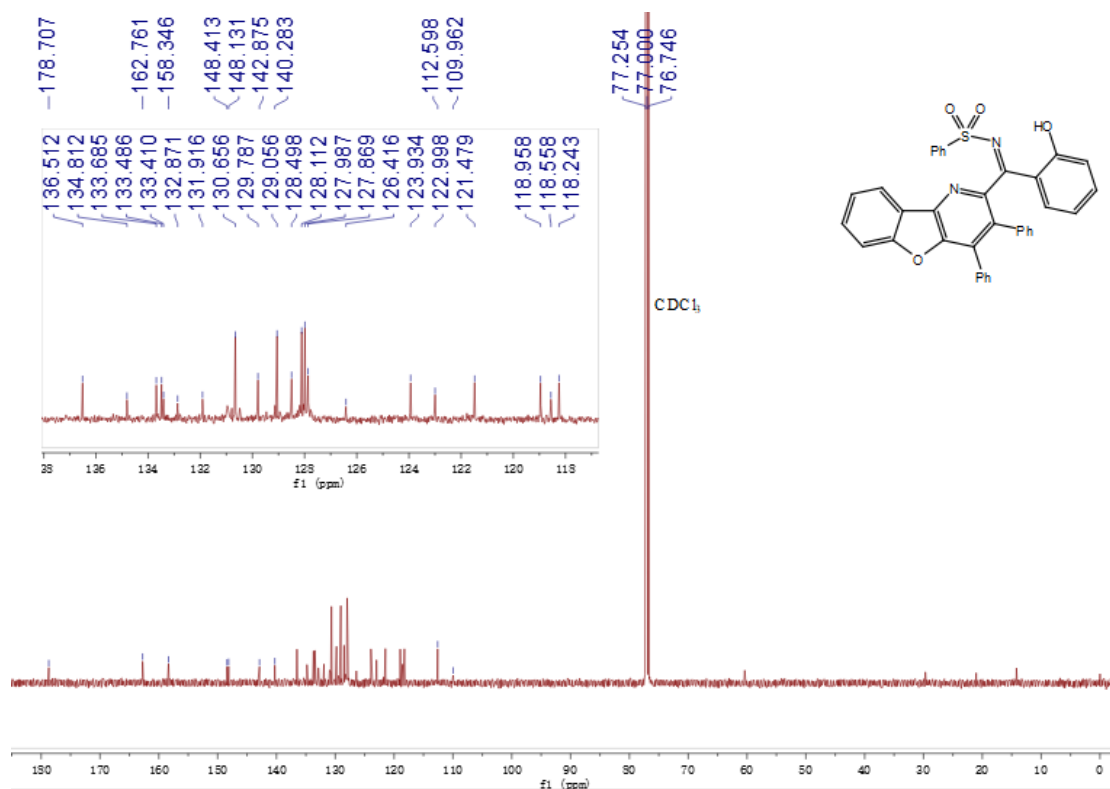

<sup>13</sup>C {<sup>1</sup>H} NMR of **2c** (125 MHz, CDCl<sub>3</sub>)

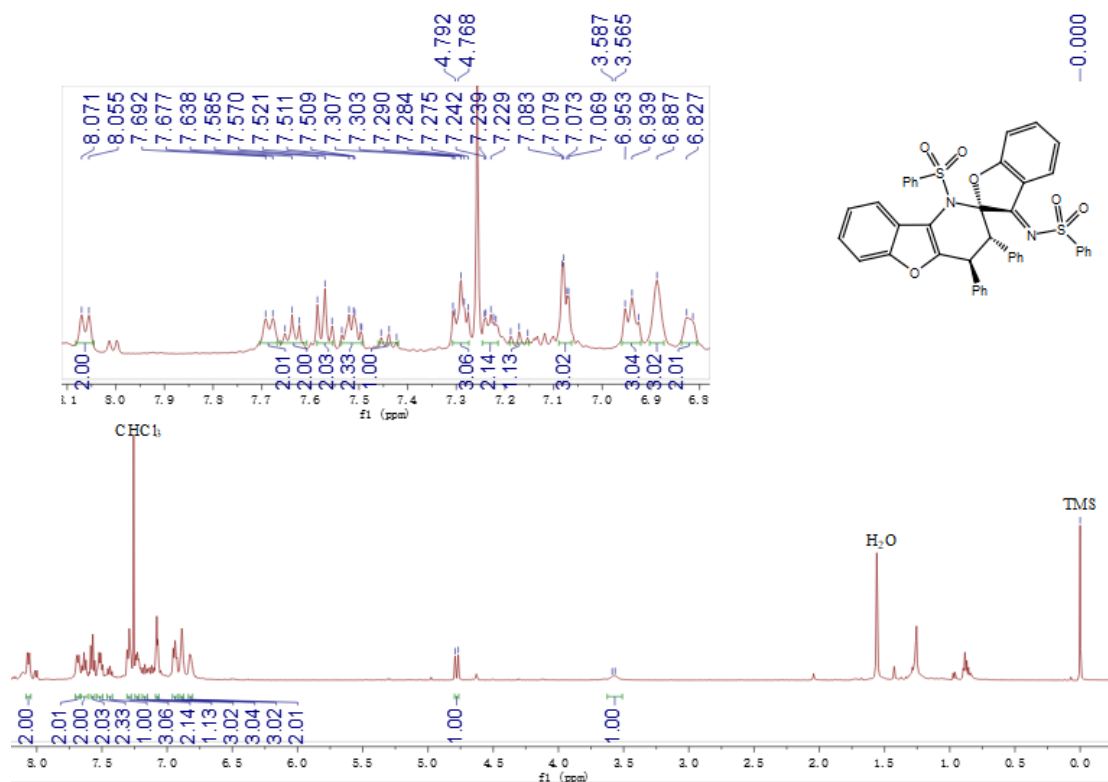

<sup>1</sup>H NMR of **3c** (500 MHz, CDCl<sub>3</sub>)

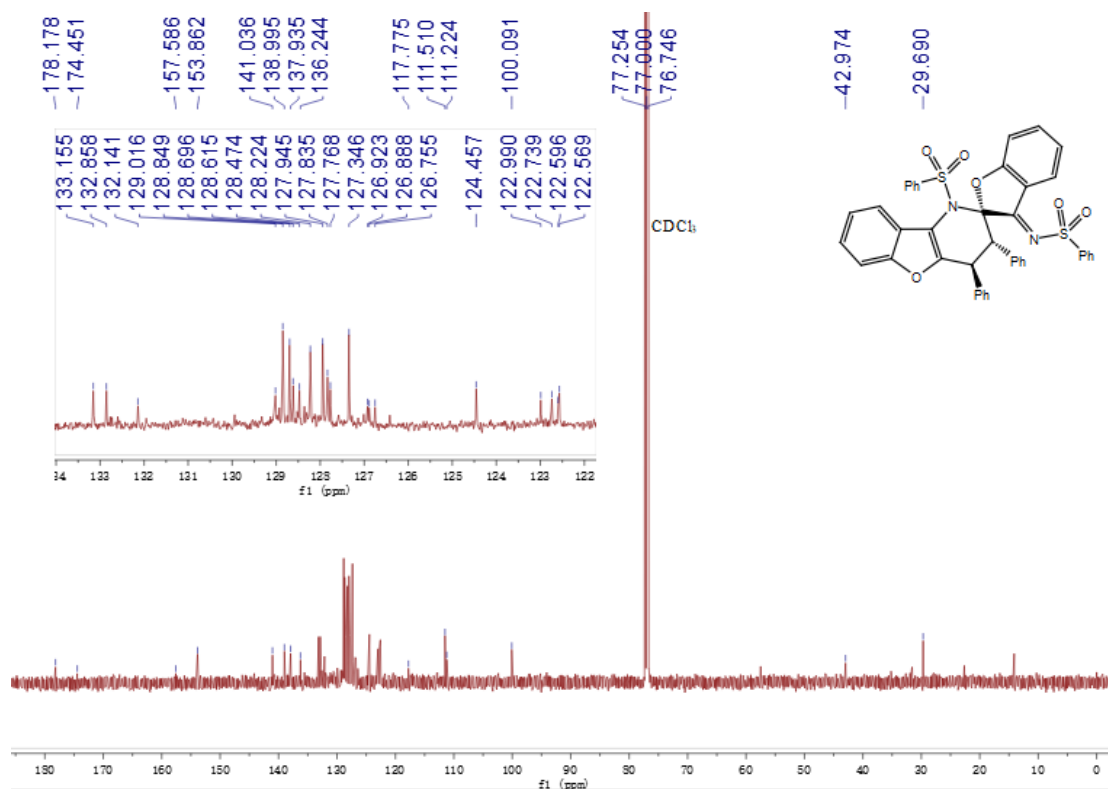

<sup>13</sup>C {<sup>1</sup>H} NMR of **3c** (125 MHz, CDCl<sub>3</sub>)

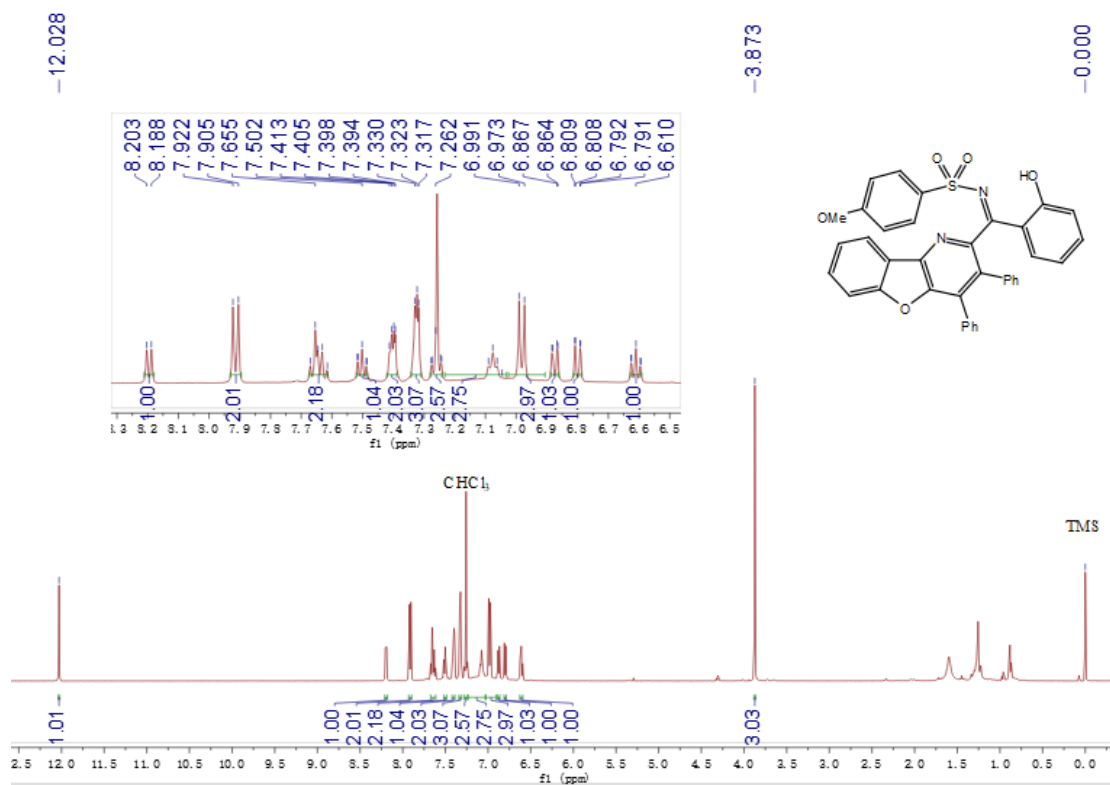

<sup>1</sup>H NMR of **2d** (500 MHz, CDCl<sub>3</sub>)

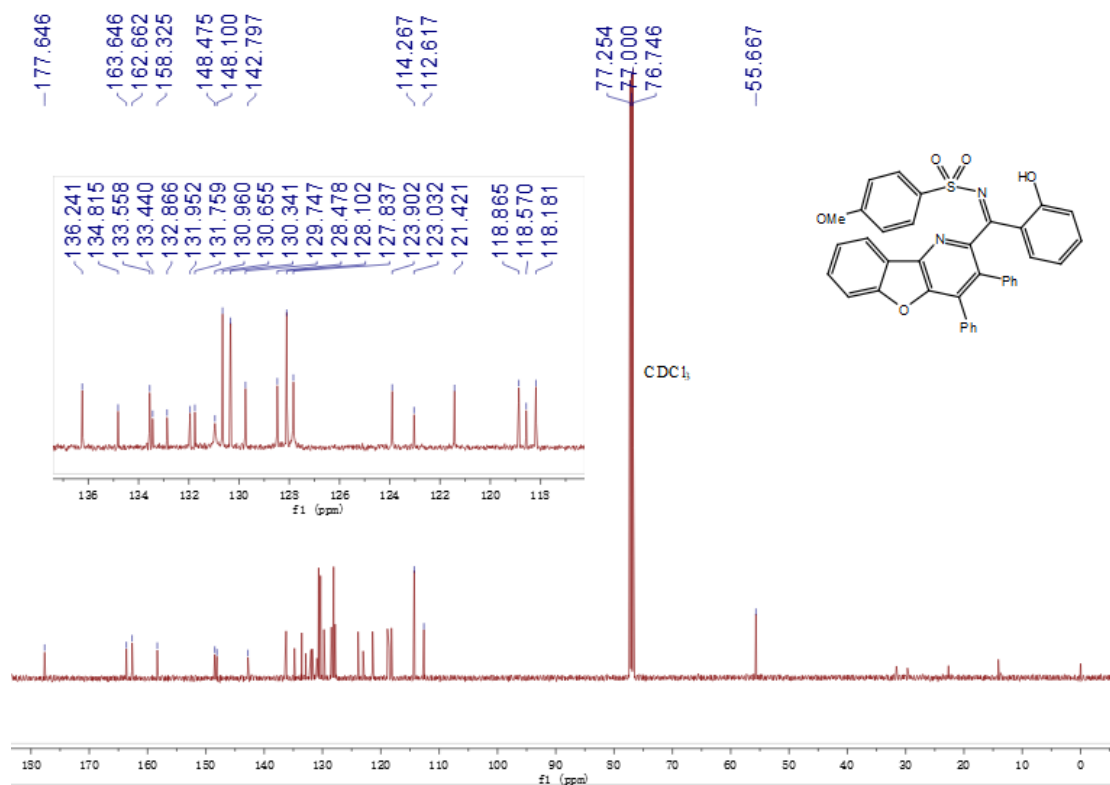

<sup>13</sup>C {<sup>1</sup>H} NMR of **2d** (125 MHz, CDCl<sub>3</sub>)

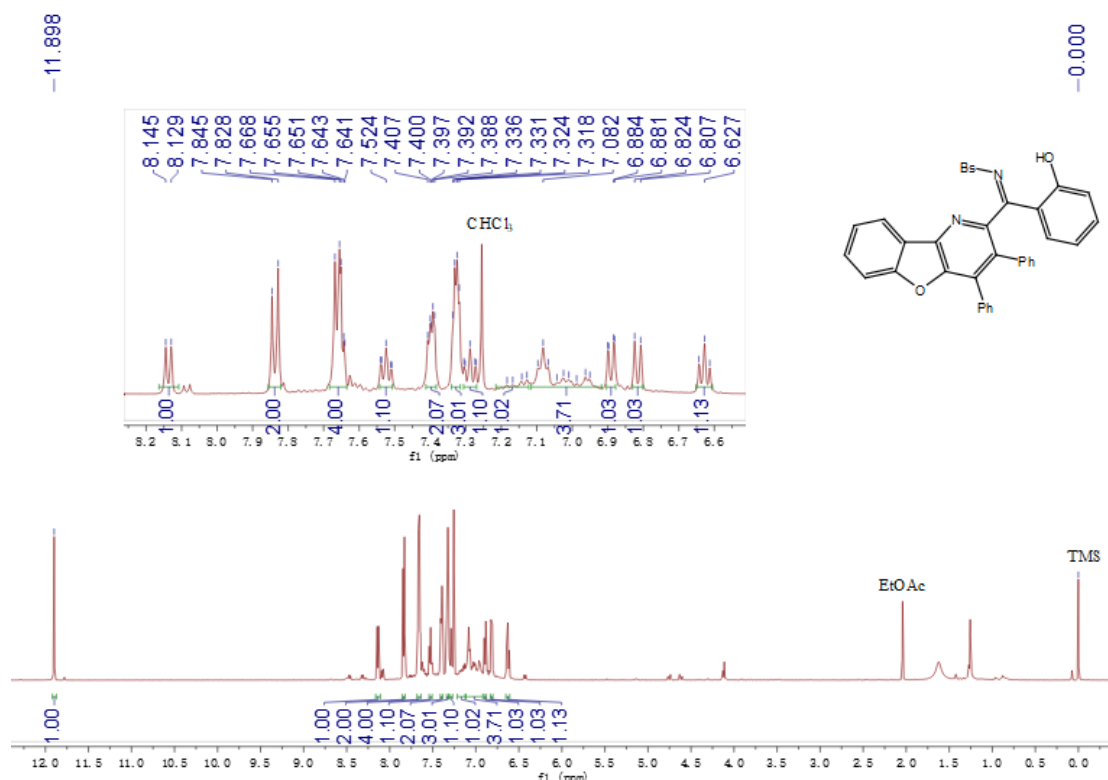

<sup>1</sup>H NMR of **2e** (500 MHz, CDCl<sub>3</sub>)

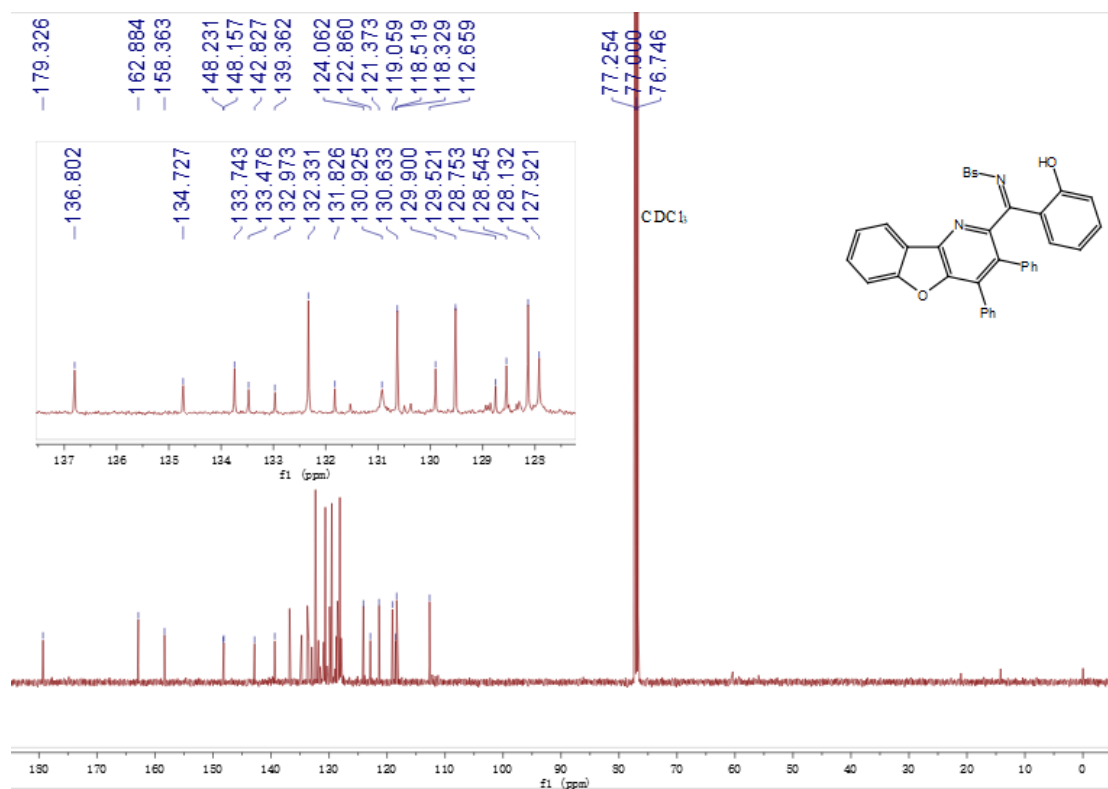

<sup>13</sup>C {<sup>1</sup>H} NMR of **2e** (125 MHz, CDCl<sub>3</sub>)

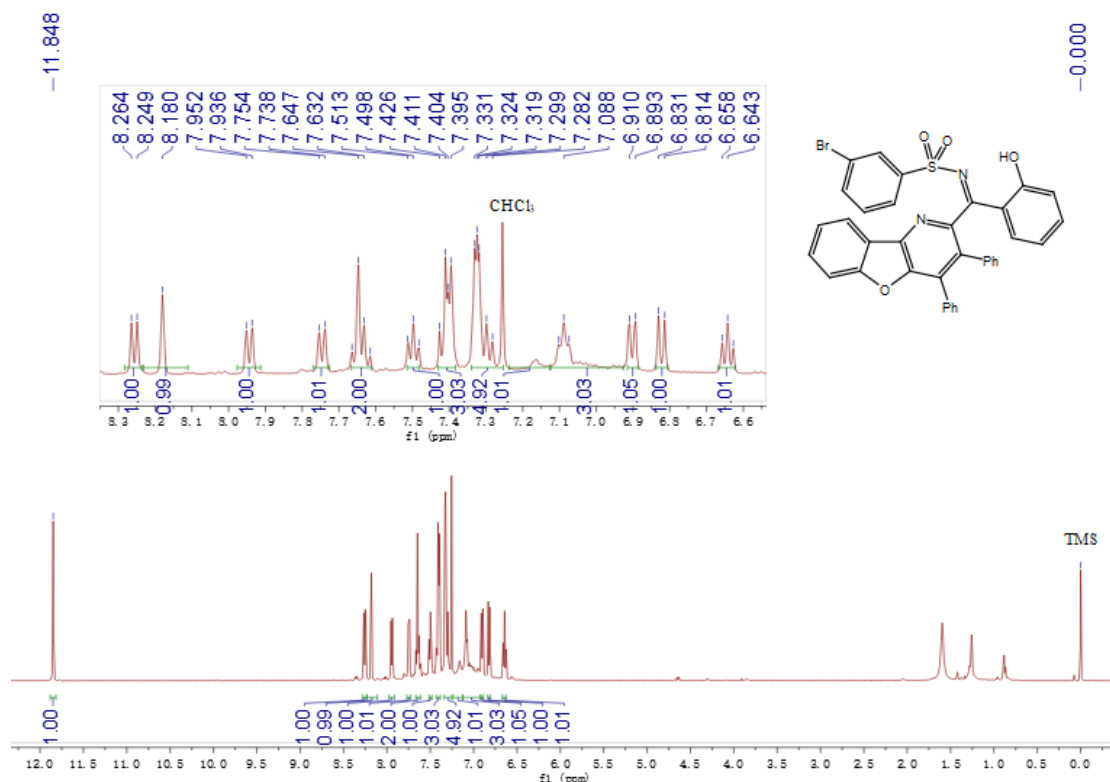

<sup>1</sup>H NMR of **2f** (500 MHz, CDCl<sub>3</sub>)

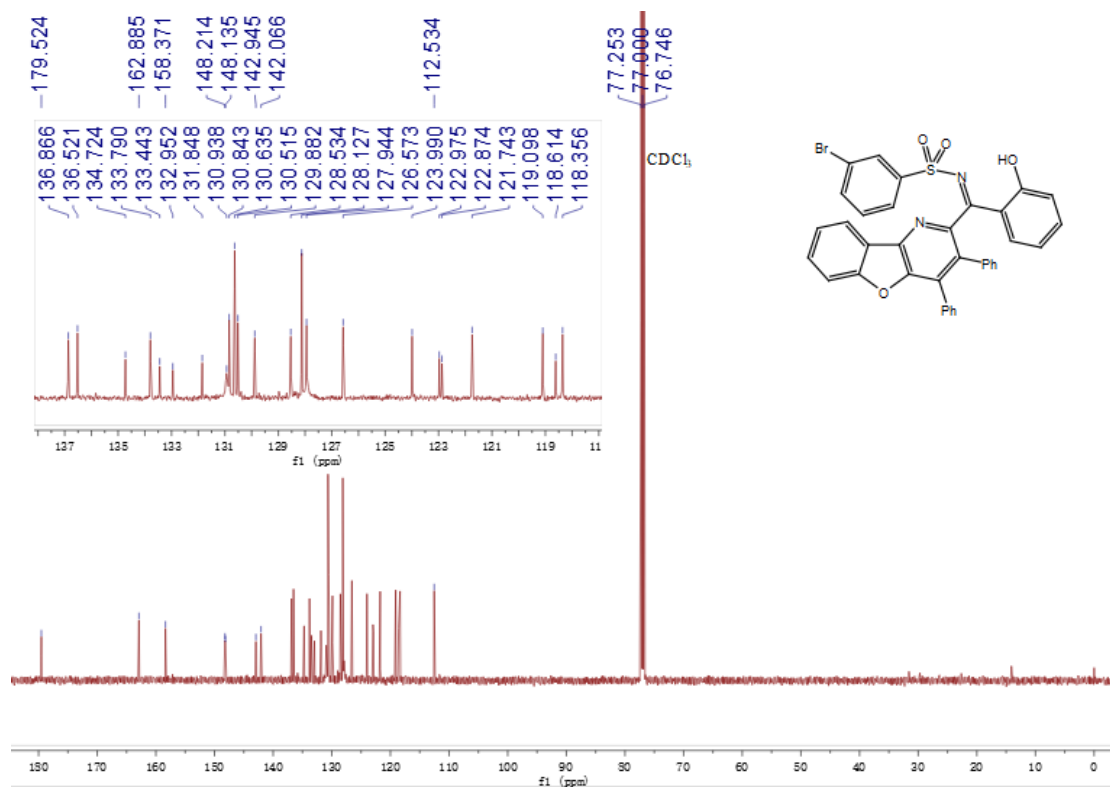

<sup>13</sup>C {<sup>1</sup>H} NMR of **2f** (125 MHz, CDCl<sub>3</sub>)

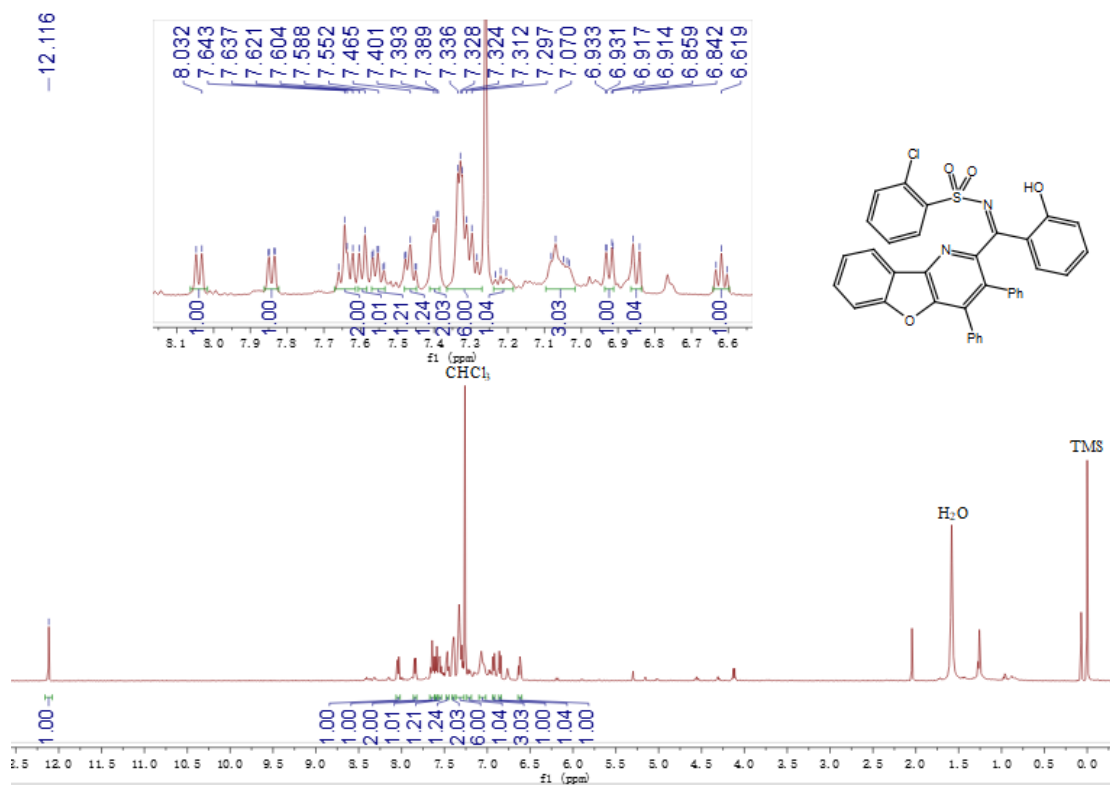

<sup>1</sup>H NMR of **2g** (500 MHz, CDCl<sub>3</sub>)

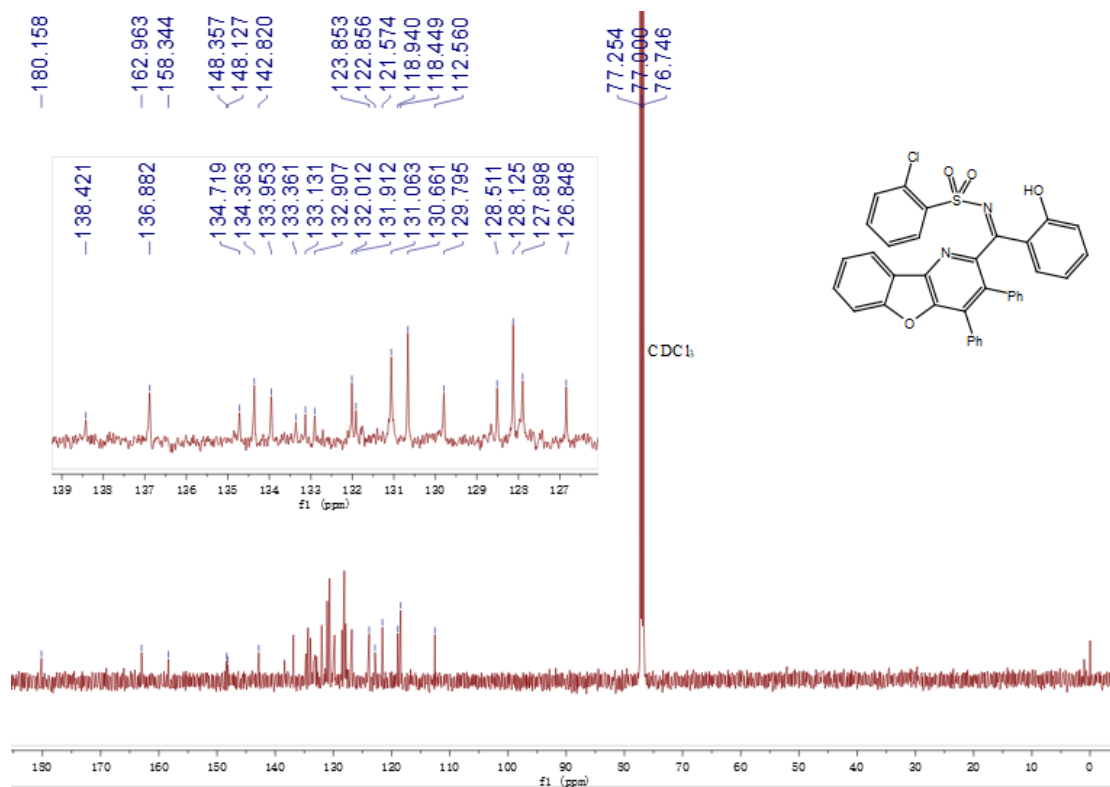

<sup>13</sup>C {<sup>1</sup>H} NMR of **2g** (125 MHz, CDCl<sub>3</sub>)

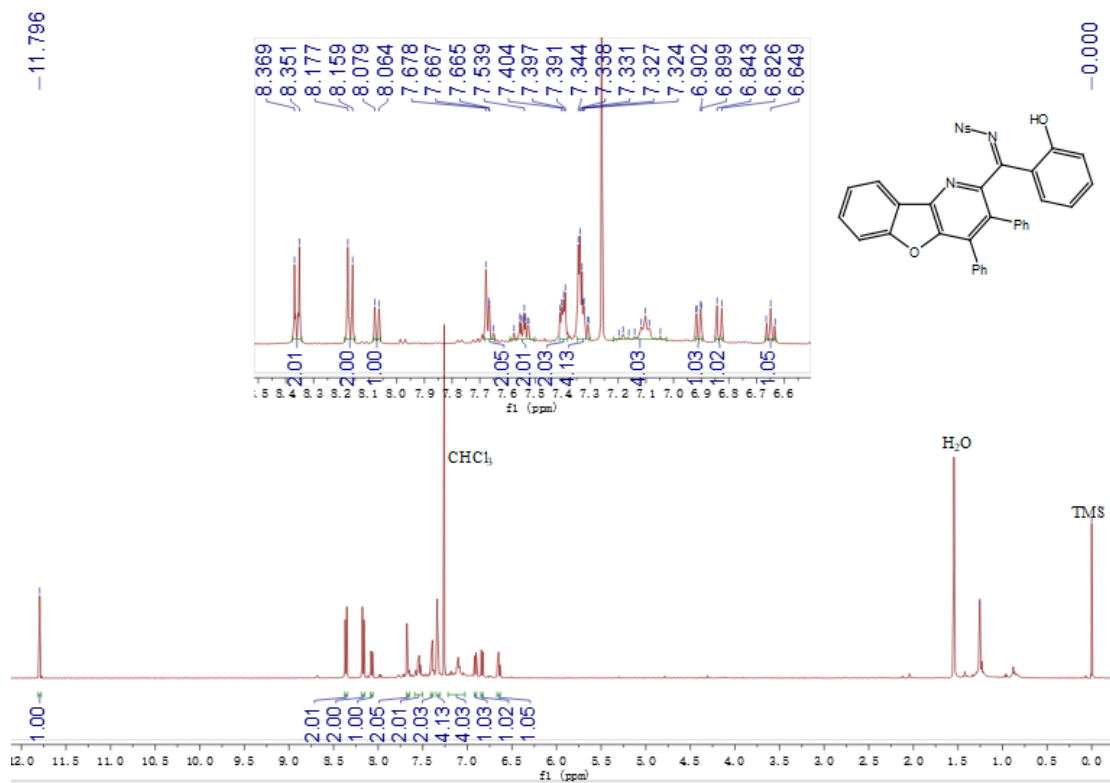

<sup>1</sup>H NMR of **2h** (500 MHz, CDCl<sub>3</sub>)

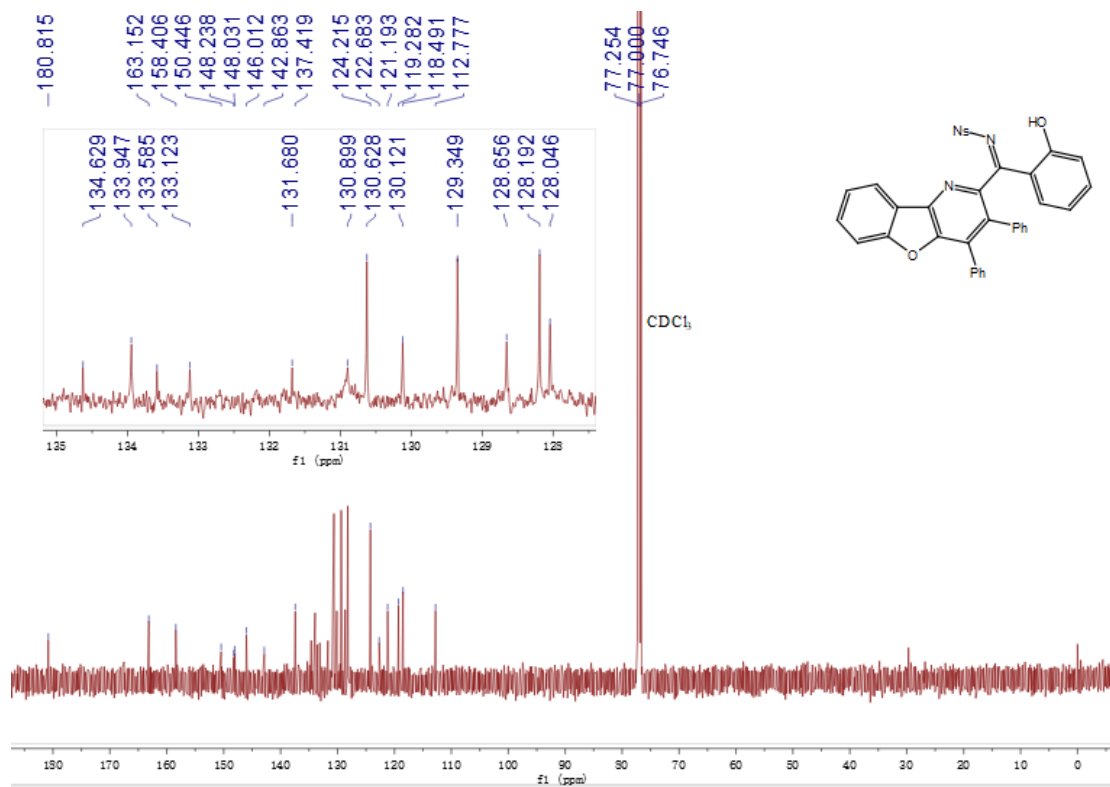

<sup>13</sup>C{<sup>1</sup>H} NMR of **2h** (125 MHz, CDCl<sub>3</sub>)

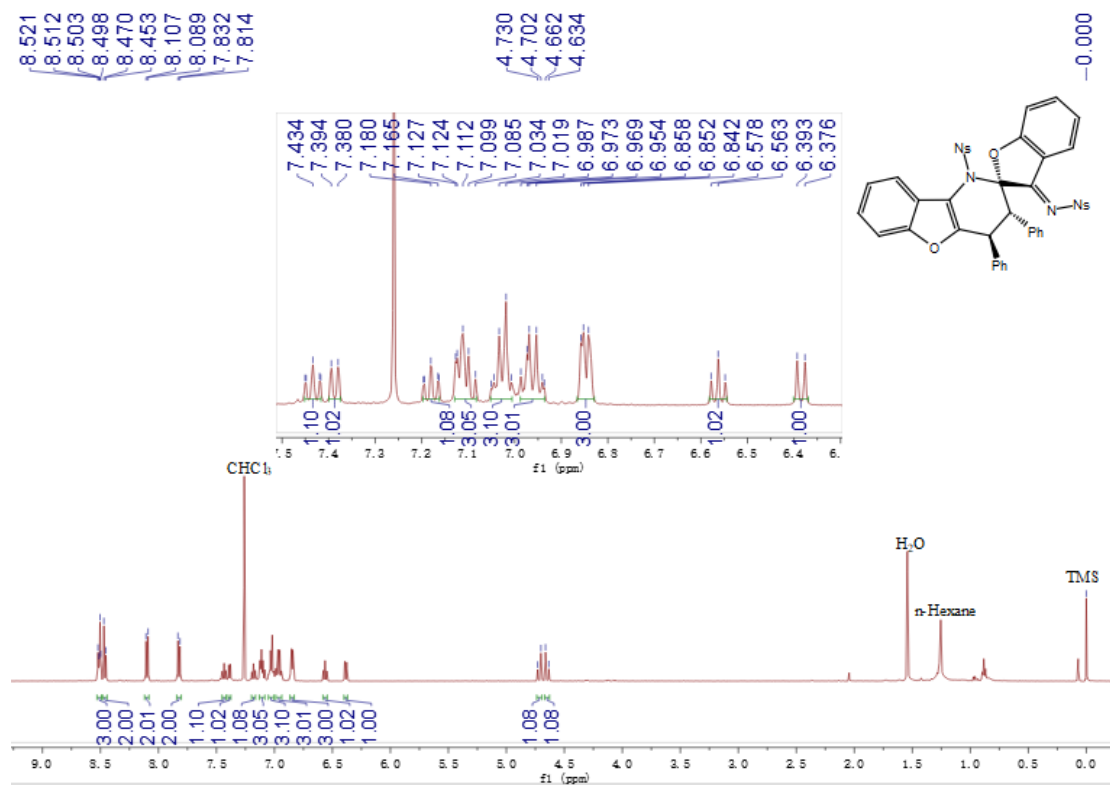

**<sup>1</sup>H NMR of 3h (500 MHz, CDCl<sub>3</sub>)**

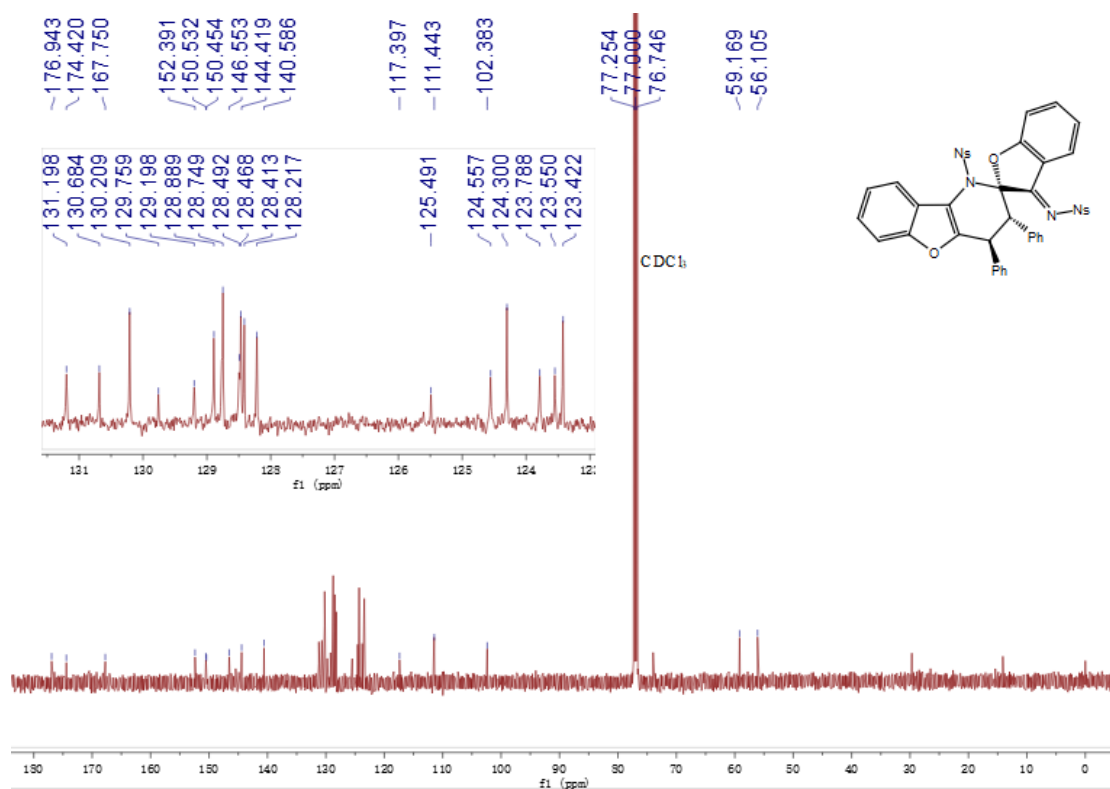

**<sup>13</sup>C {<sup>1</sup>H} NMR of 3h (125 MHz, CDCl<sub>3</sub>)**

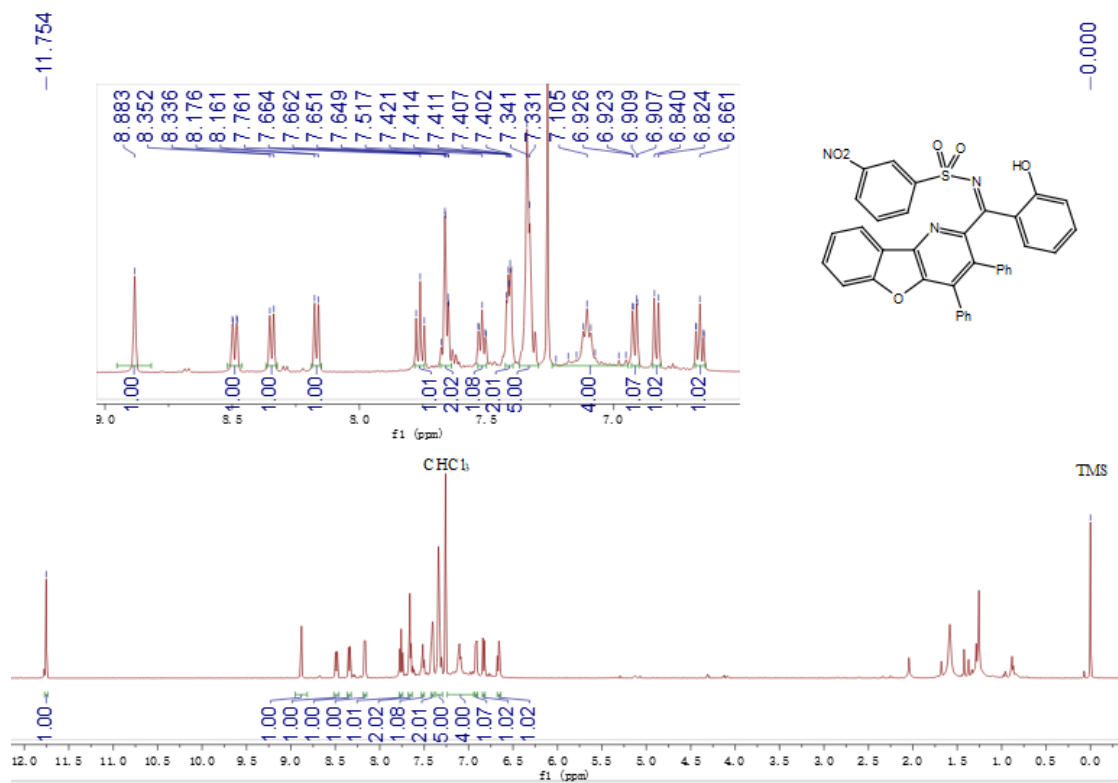

<sup>1</sup>H NMR of **2i** (500 MHz, CDCl<sub>3</sub>)

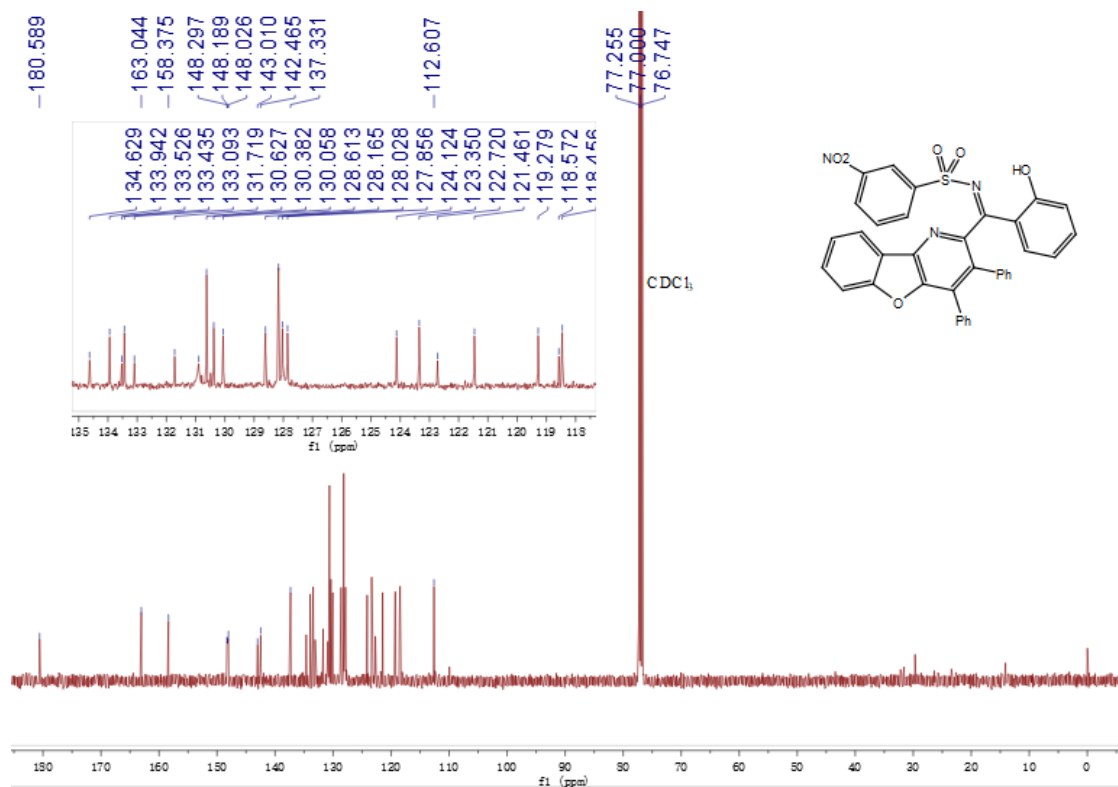

<sup>13</sup>C {<sup>1</sup>H} NMR of **2i** (125 MHz, CDCl<sub>3</sub>)

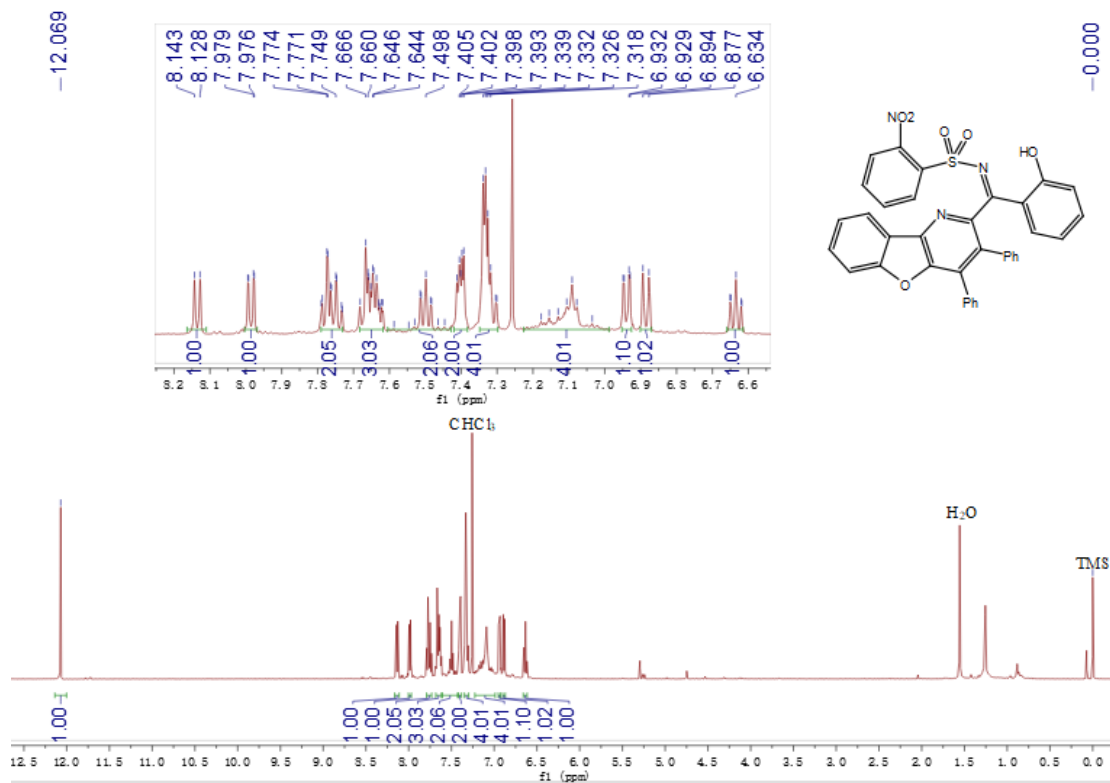

<sup>1</sup>H NMR of **2j** (500 MHz, CDCl<sub>3</sub>)

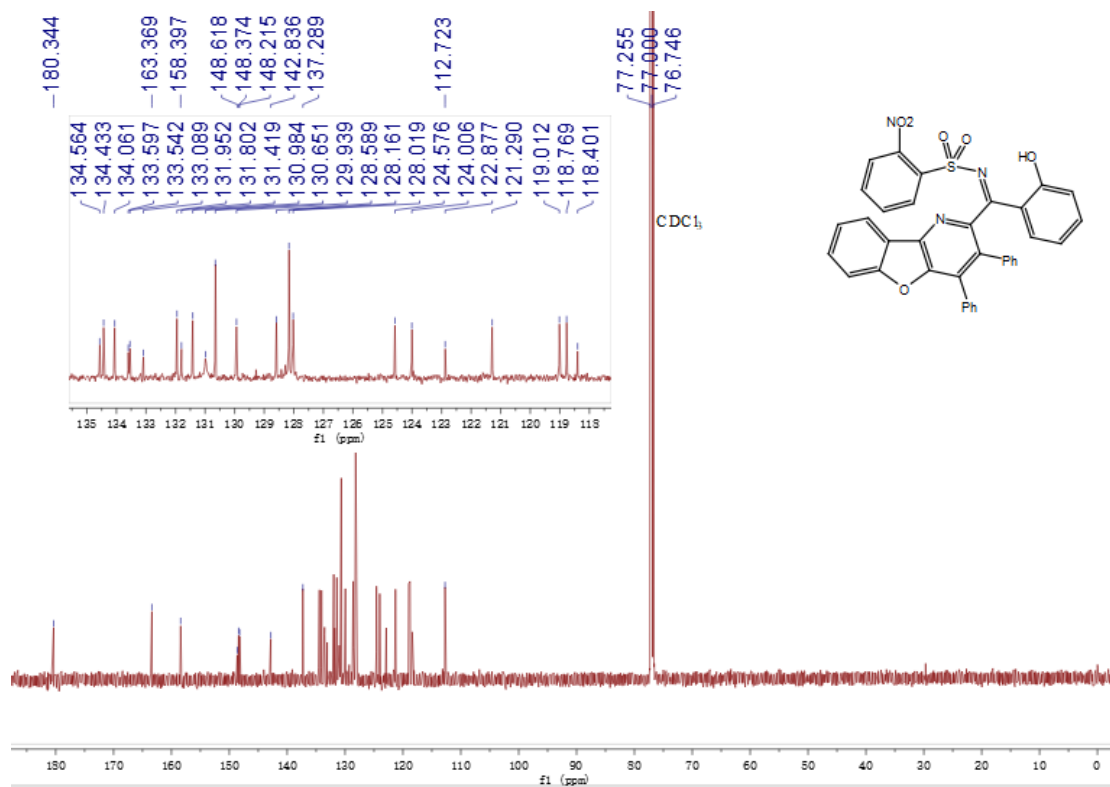

<sup>13</sup>C {<sup>1</sup>H} NMR of **2j** (125 MHz, CDCl<sub>3</sub>)

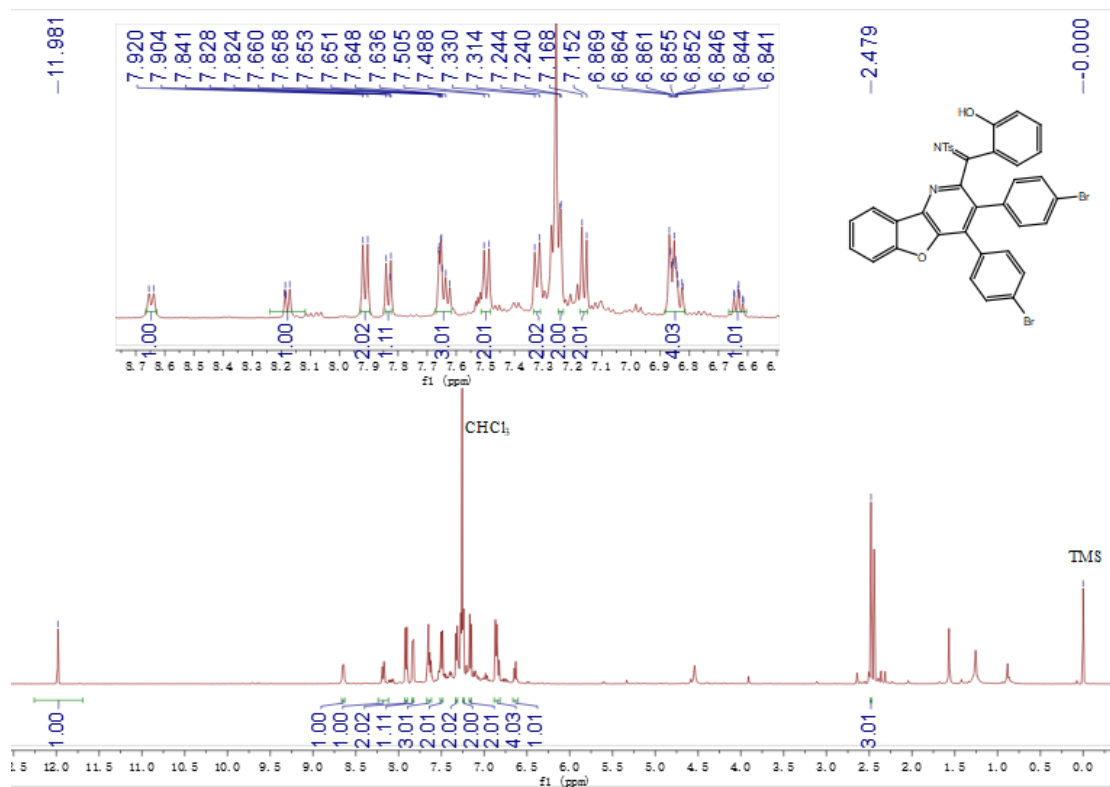

<sup>1</sup>H NMR of **2k** (500 MHz, CDCl<sub>3</sub>)

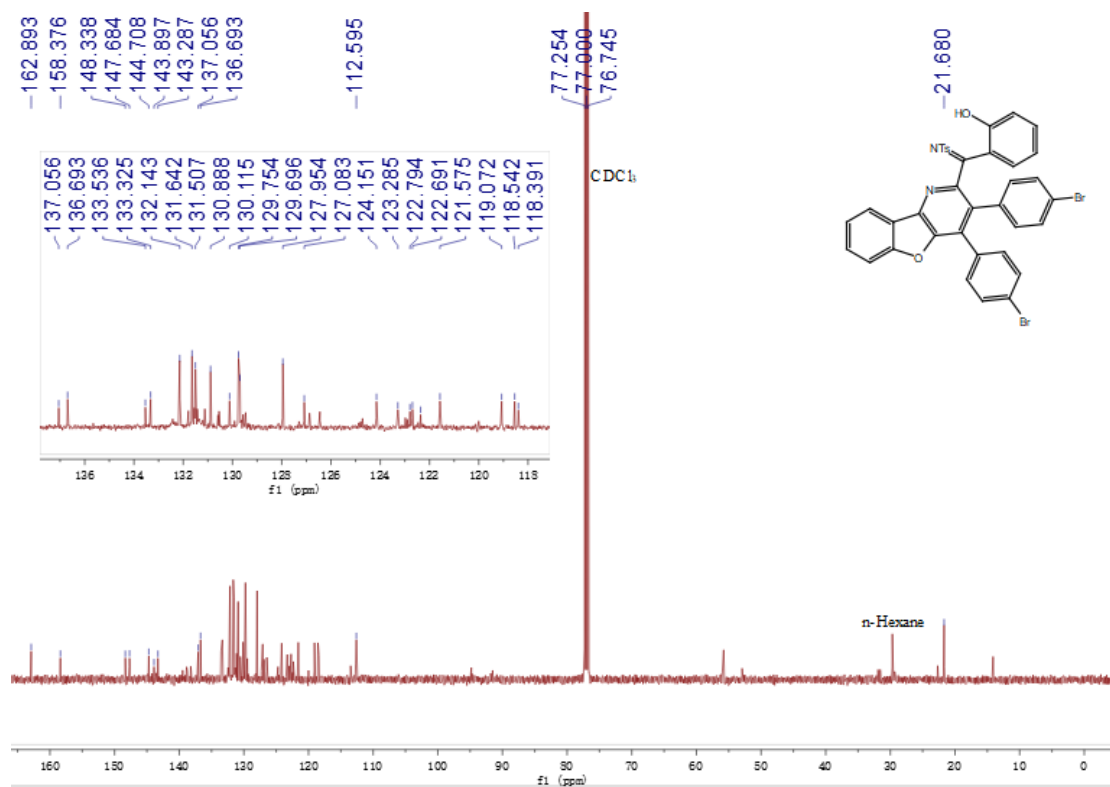

<sup>13</sup>C {<sup>1</sup>H} NMR of **2k** (125 MHz, CDCl<sub>3</sub>)

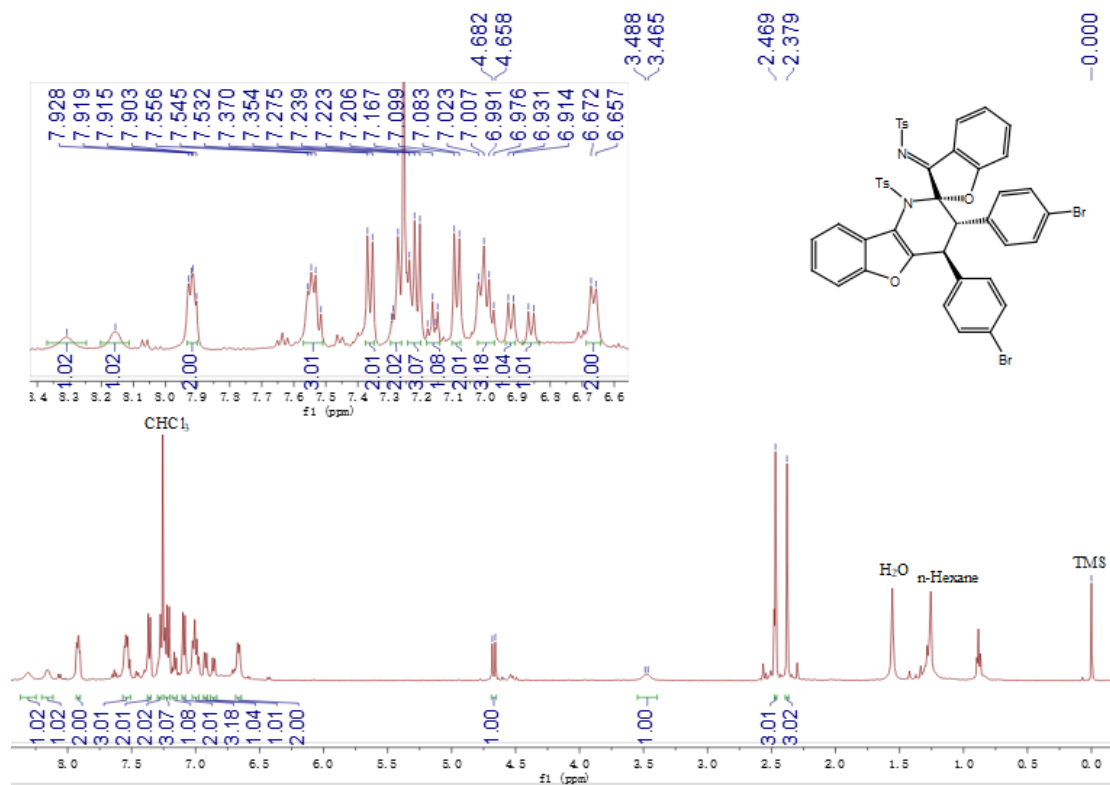

$^1\text{H}$  NMR of **3k** (500 MHz,  $\text{CDCl}_3$ )

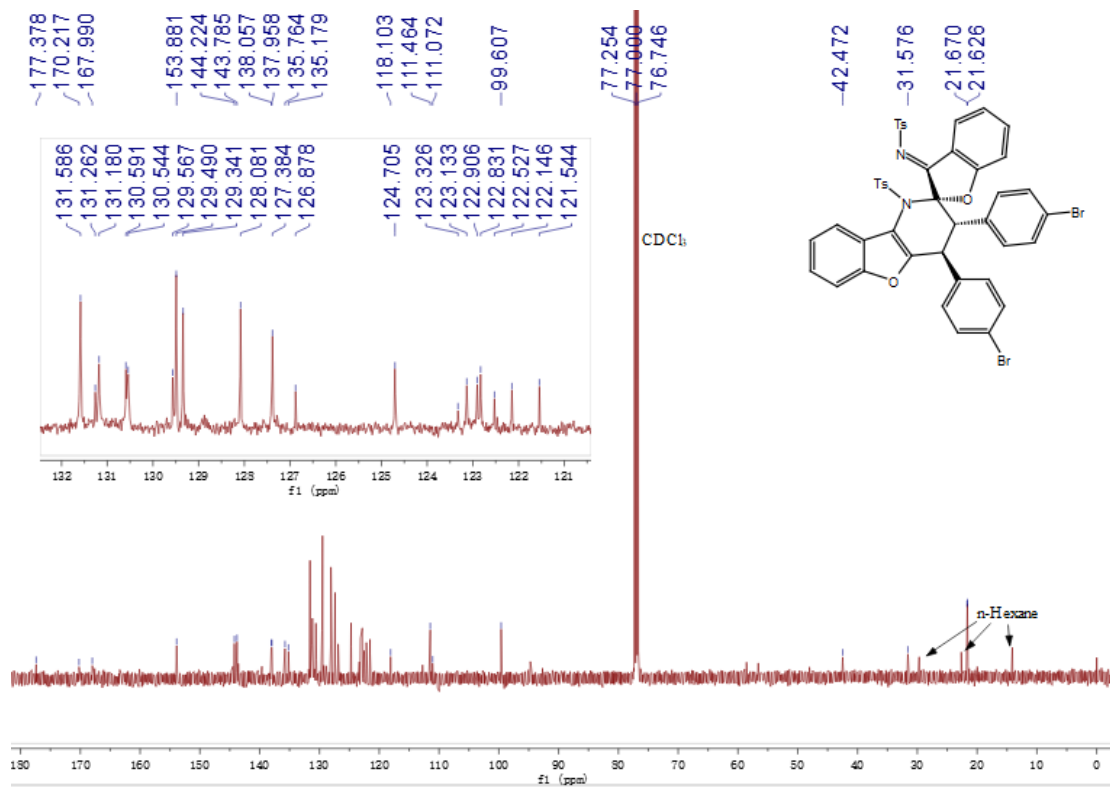

$^{13}\text{C}\{^1\text{H}\}$  NMR of **3k** (125 MHz,  $\text{CDCl}_3$ )

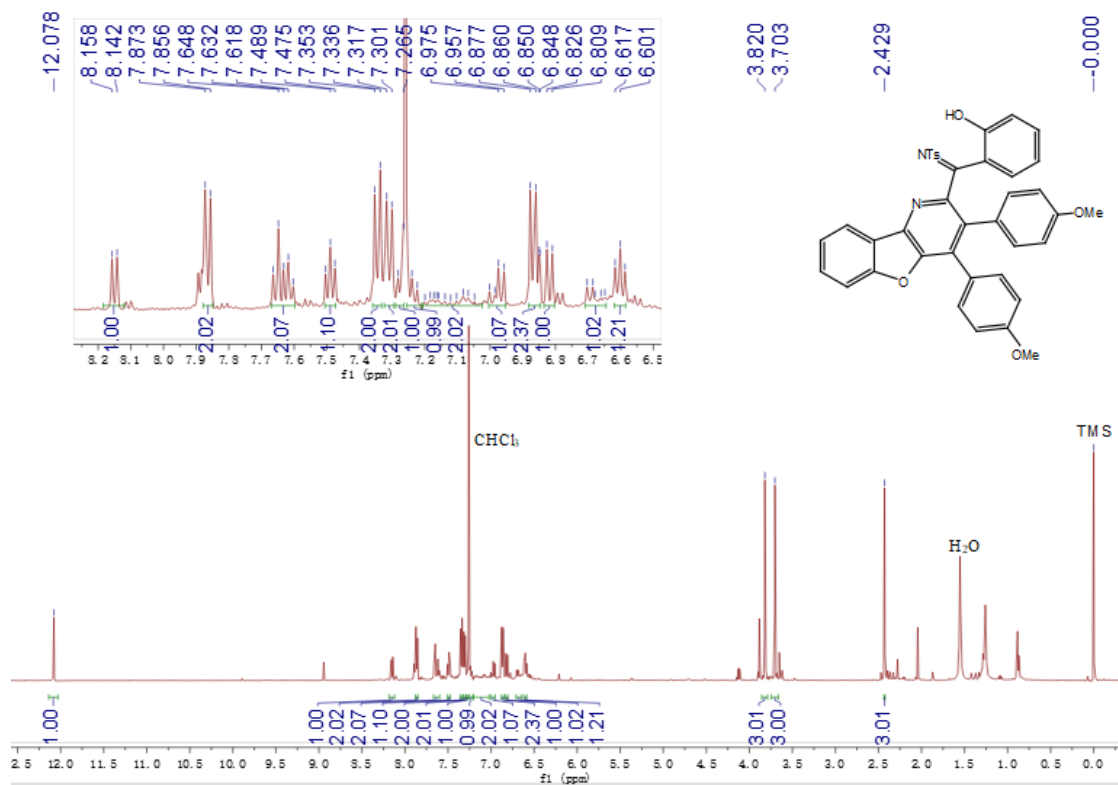

<sup>1</sup>H NMR of **21** (500 MHz, CDCl<sub>3</sub>)

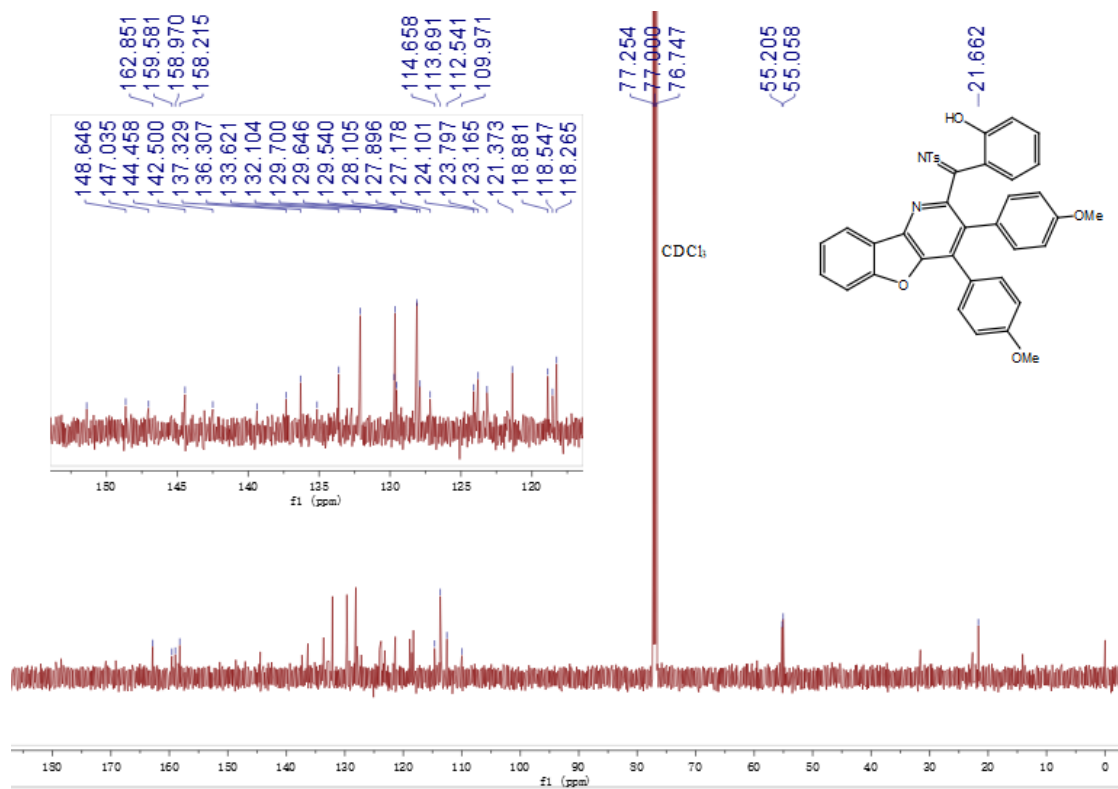

<sup>13</sup>C {<sup>1</sup>H} NMR of **21** (125 MHz, CDCl<sub>3</sub>)

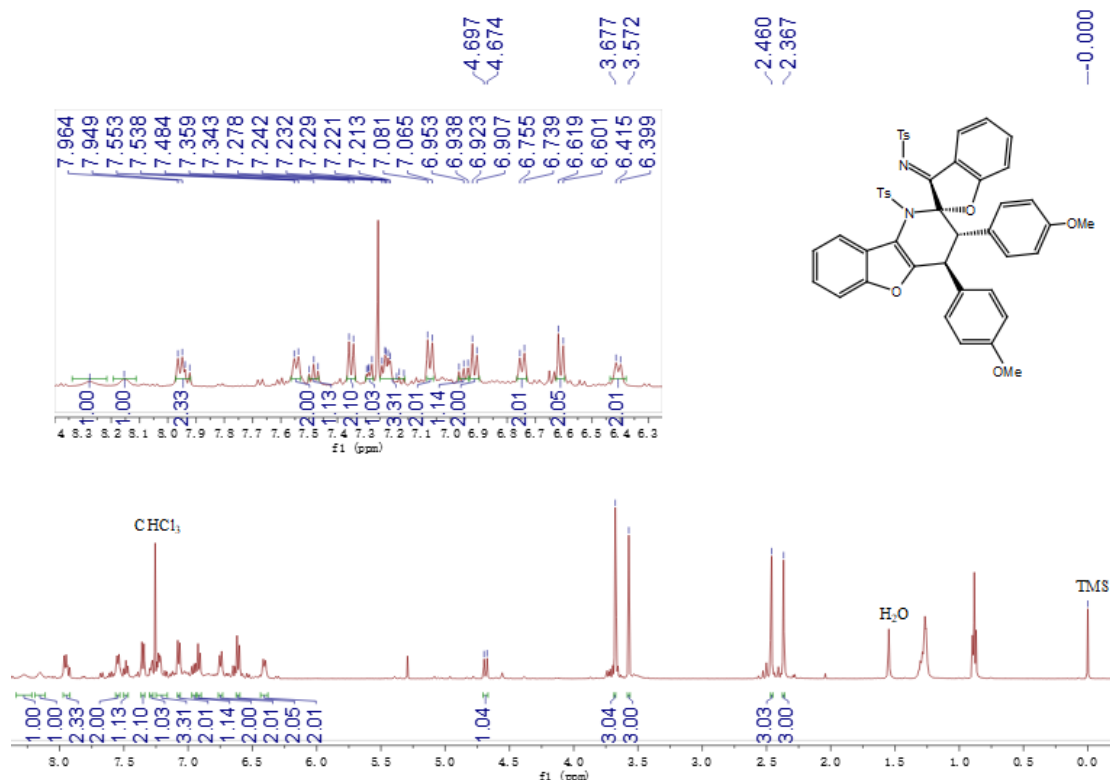

<sup>1</sup>H NMR of **31** (500 MHz, CDCl<sub>3</sub>)

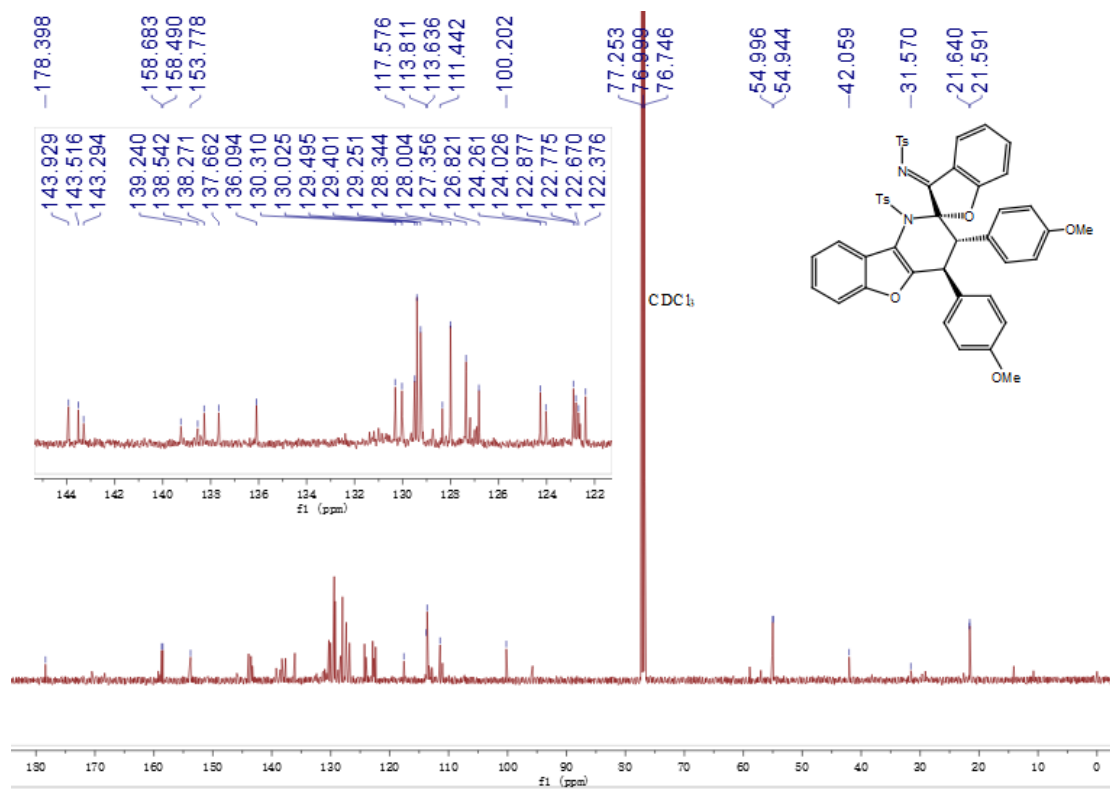

<sup>13</sup>C {<sup>1</sup>H} NMR of **31** (125 MHz, CDCl<sub>3</sub>)

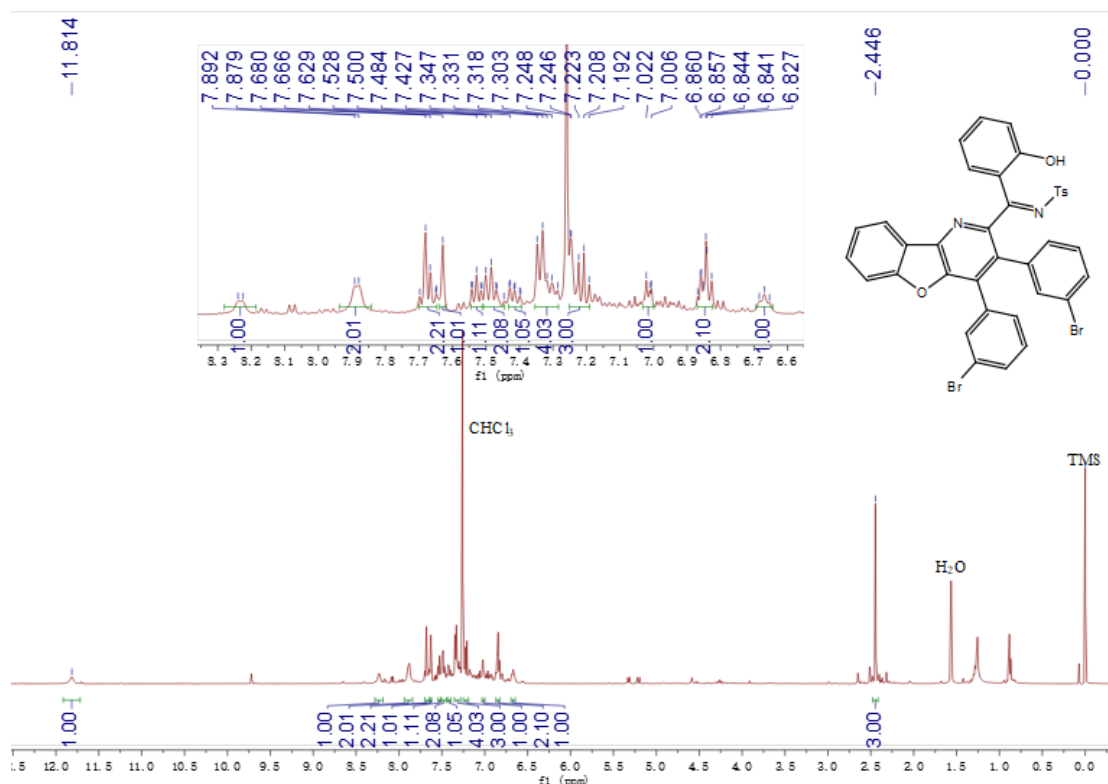

<sup>1</sup>H NMR of **2m** (500 MHz, CDCl<sub>3</sub>)

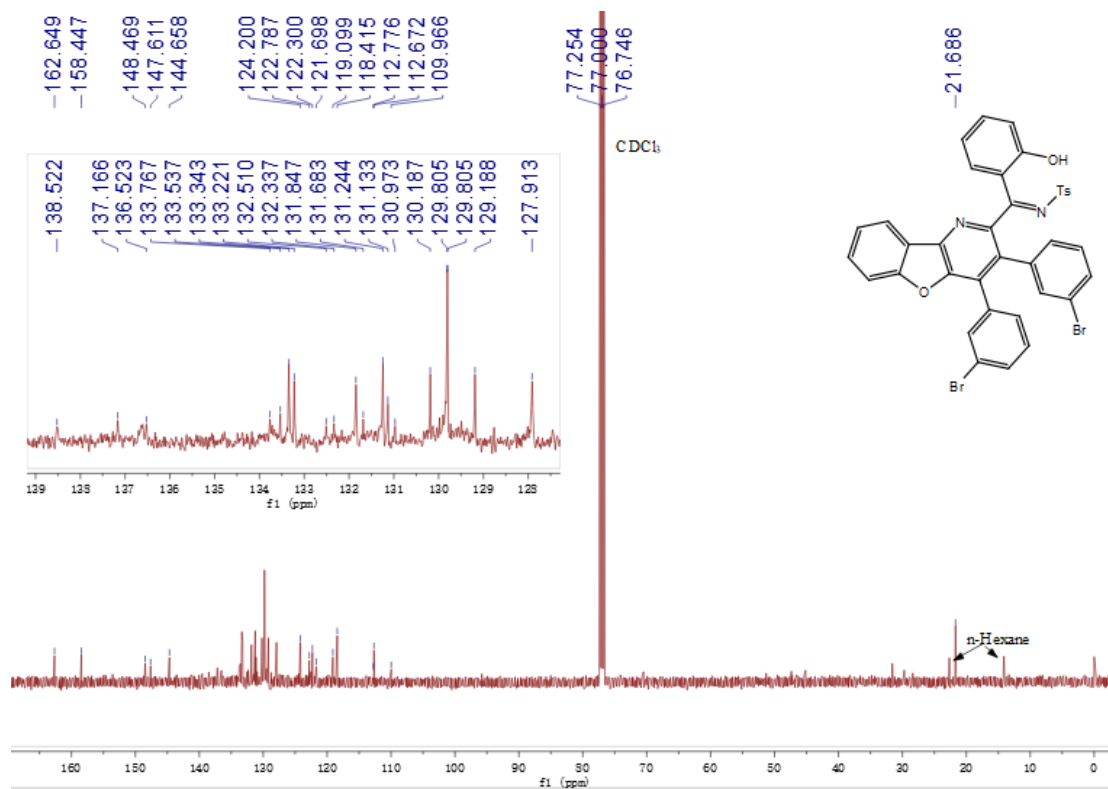

<sup>13</sup>C{<sup>1</sup>H} NMR of **2m** (125 MHz, CDCl<sub>3</sub>)

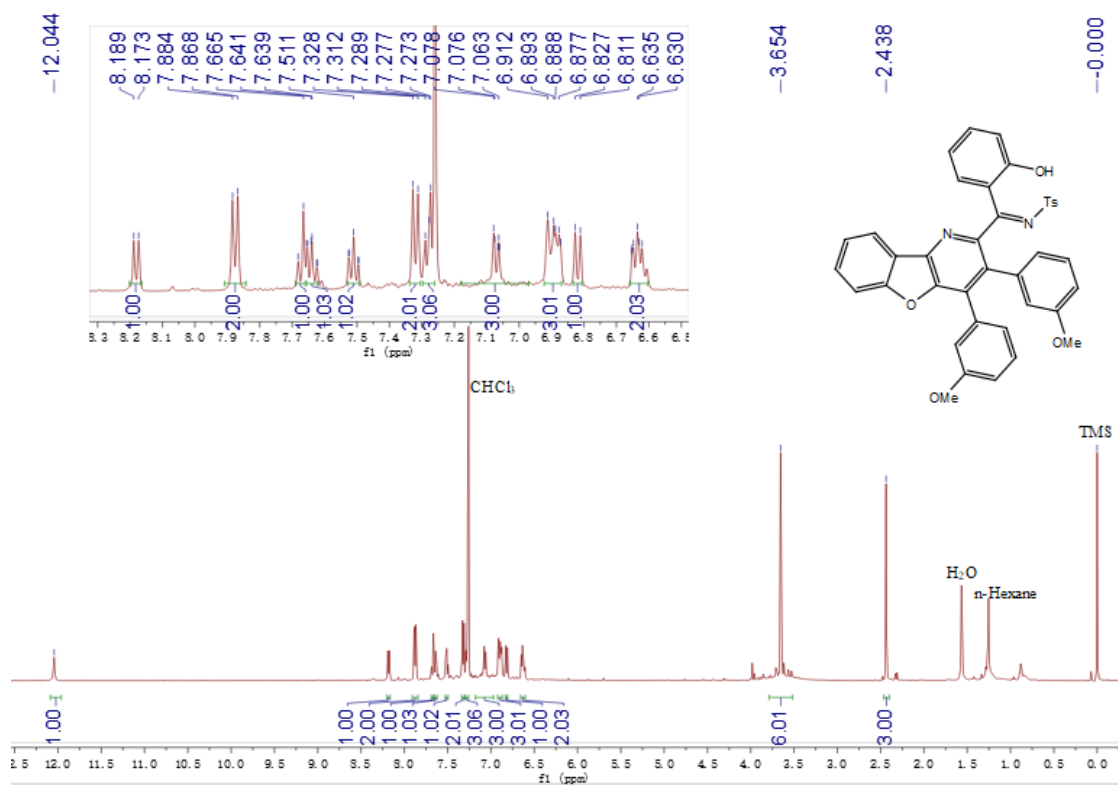

<sup>1</sup>H NMR of 2n (500 MHz, CDCl<sub>3</sub>)

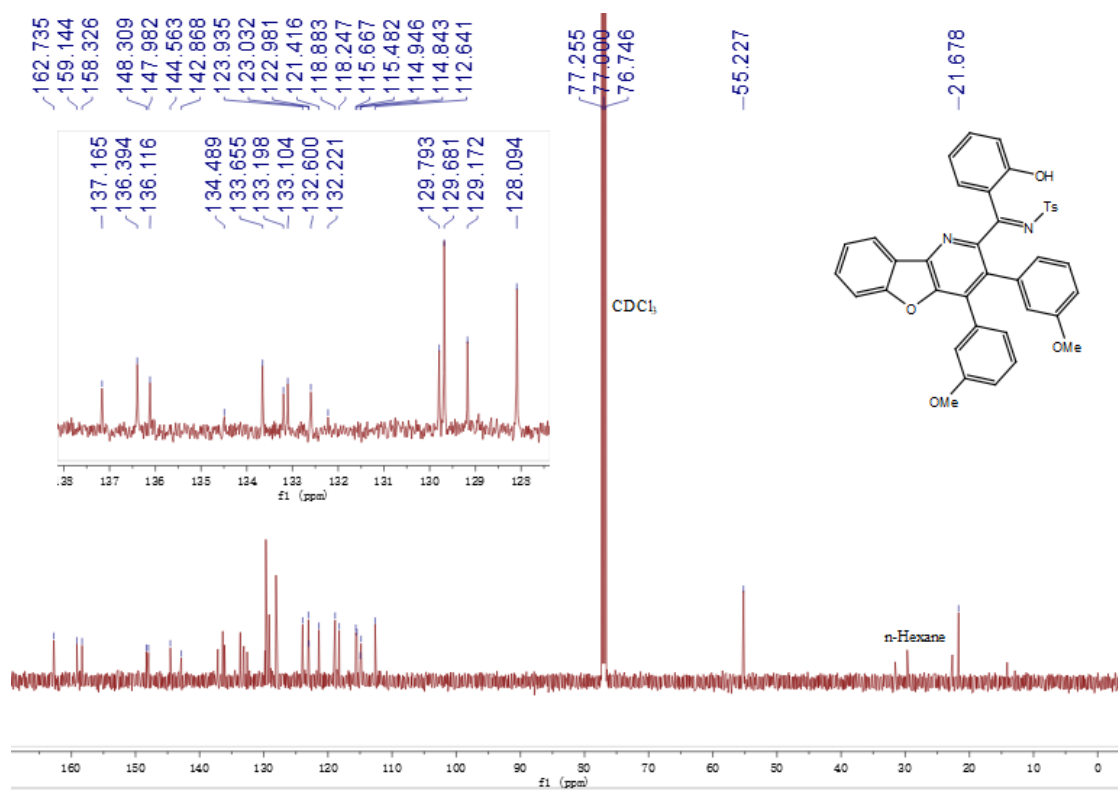

<sup>13</sup>C {<sup>1</sup>H} NMR of 2n (125 MHz, CDCl<sub>3</sub>)

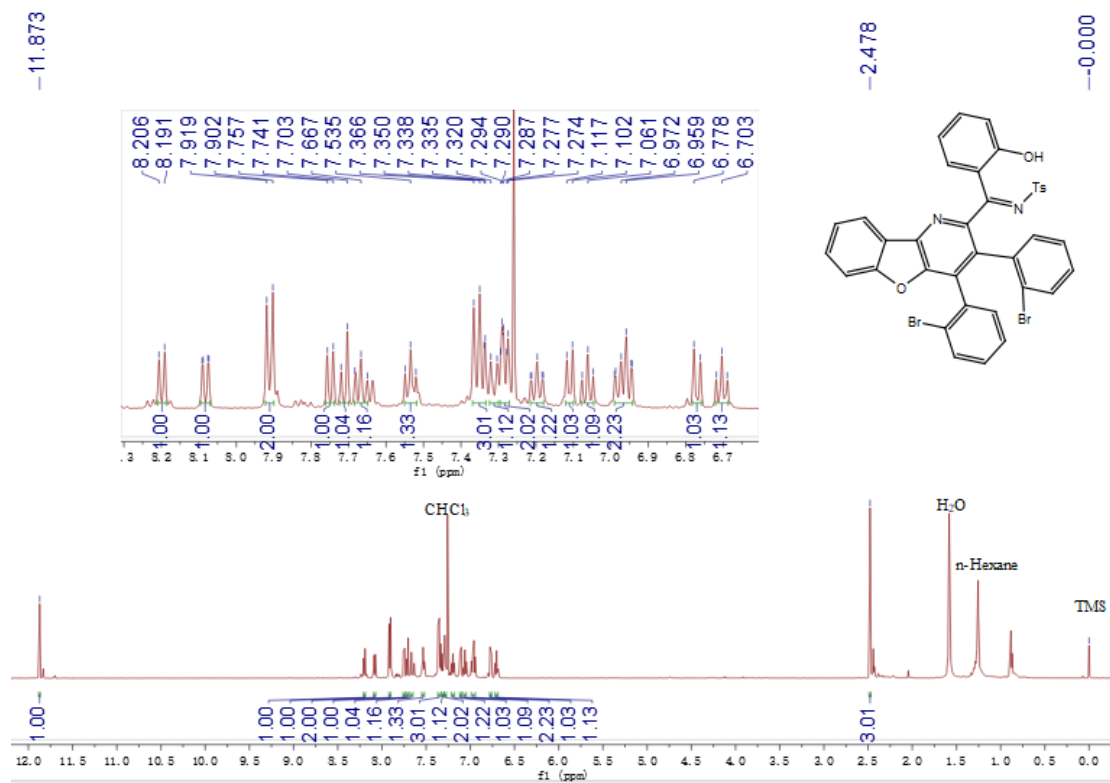

<sup>1</sup>H NMR of **2o** (500 MHz, CDCl<sub>3</sub>)

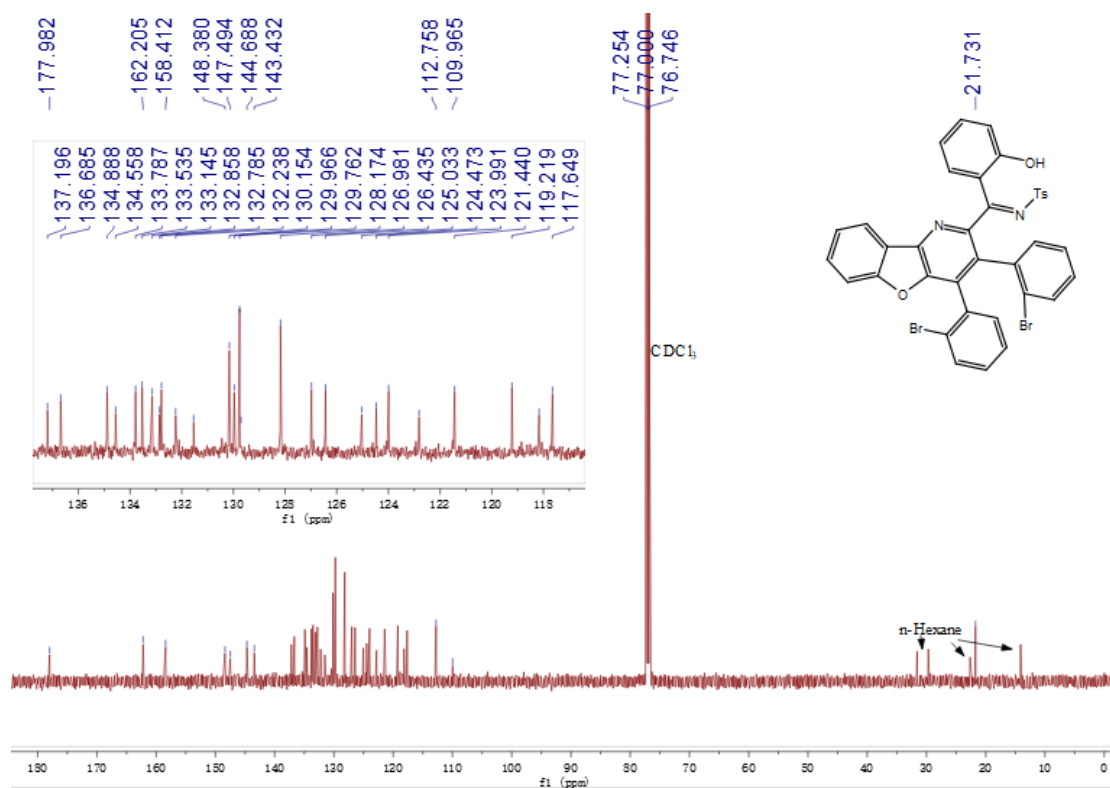

<sup>13</sup>C{<sup>1</sup>H} NMR of **2o** (125 MHz, CDCl<sub>3</sub>)

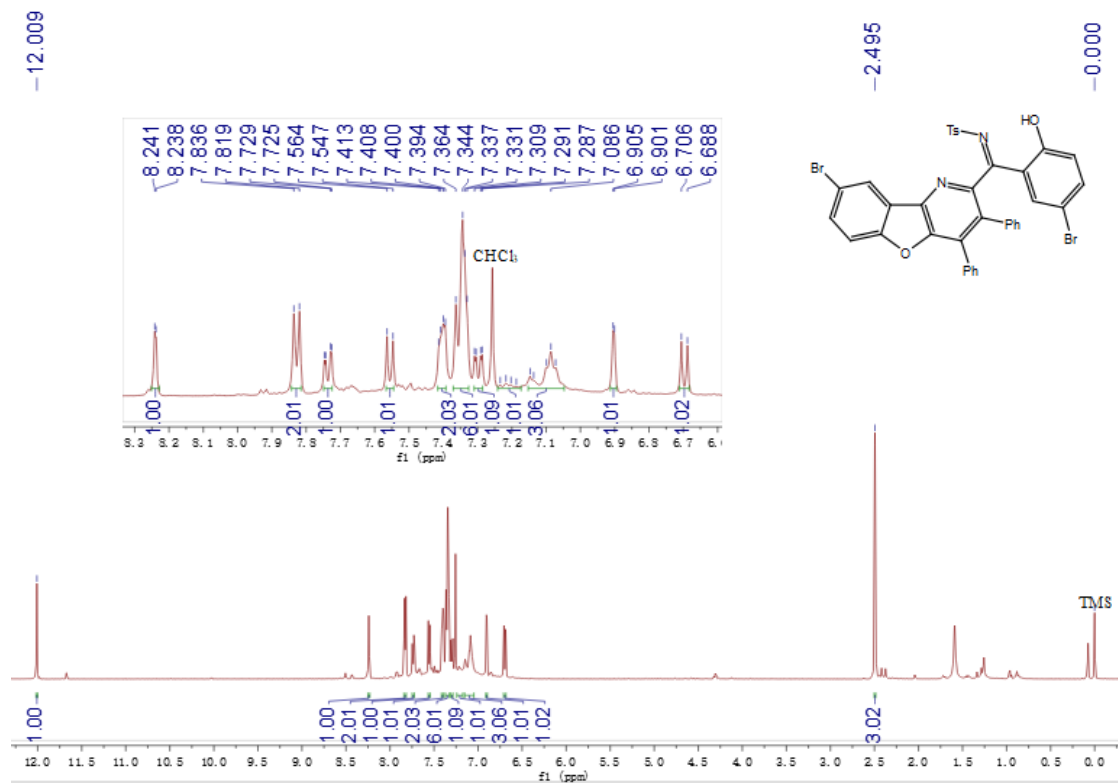

<sup>1</sup>H NMR of **2q** (500 MHz, CDCl<sub>3</sub>)

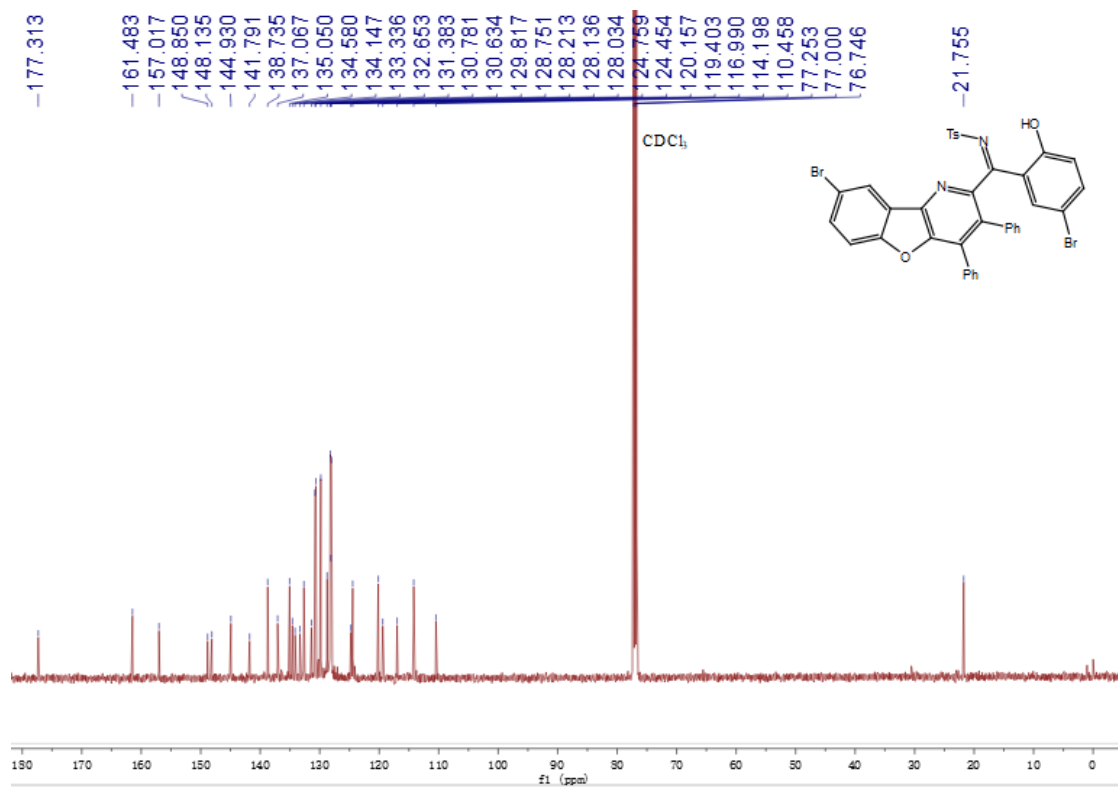

<sup>13</sup>C{<sup>1</sup>H} NMR of **2q** (125 MHz, CDCl<sub>3</sub>)



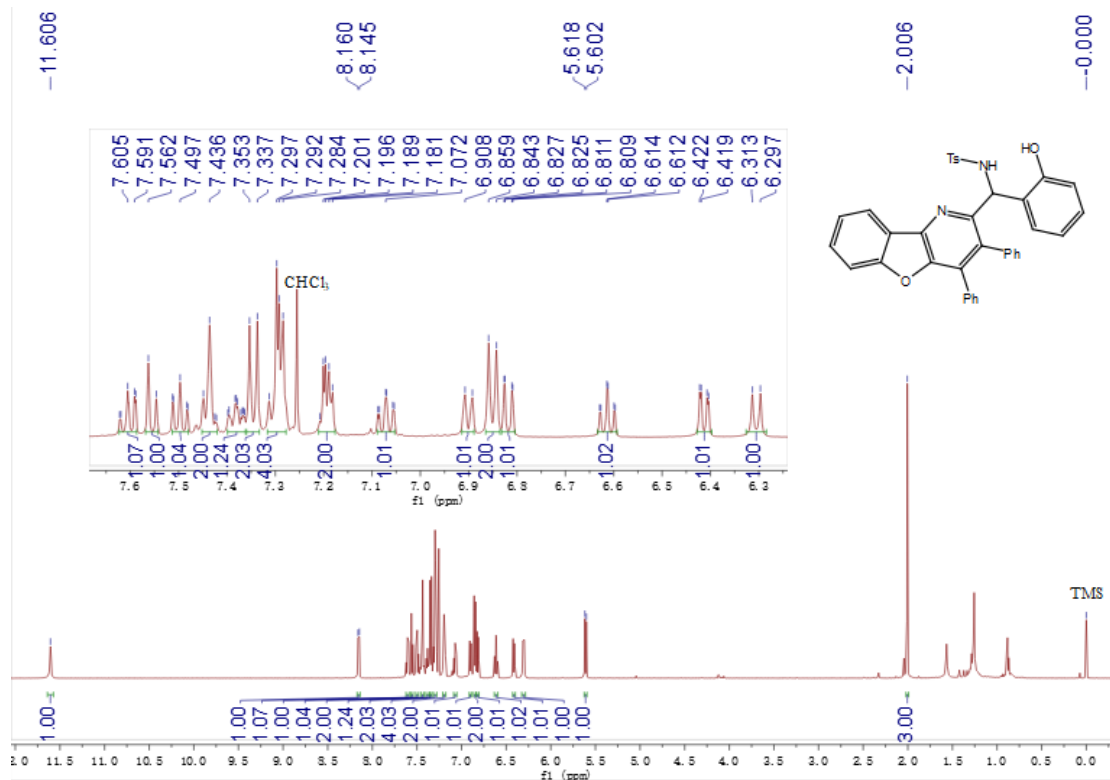

$^1\text{H NMR}$  of 4 (500 MHz,  $\text{CDCl}_3$ )

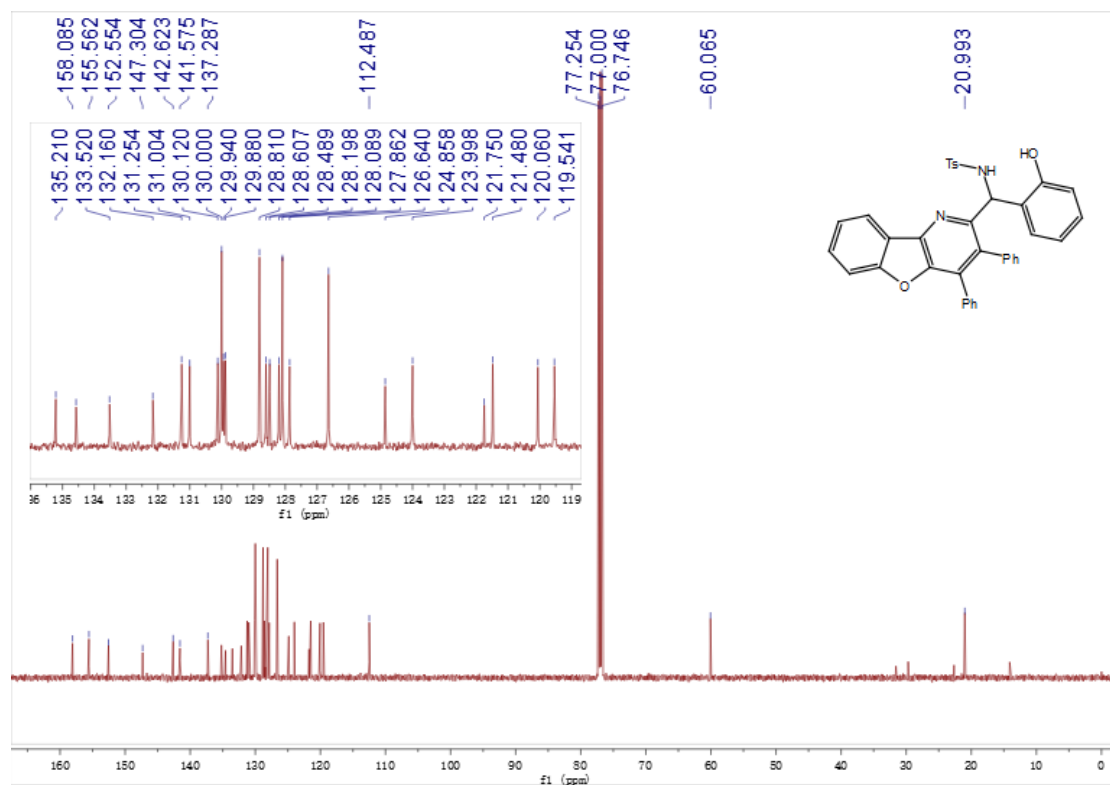

$^{13}\text{C}\{^1\text{H}\}$  NMR of 4 (125 MHz,  $\text{CDCl}_3$ )

## 6. Copies of HRMS spectra of 2a and 3a

### (1) HRMS (ESI-TOF) spectra of 2a

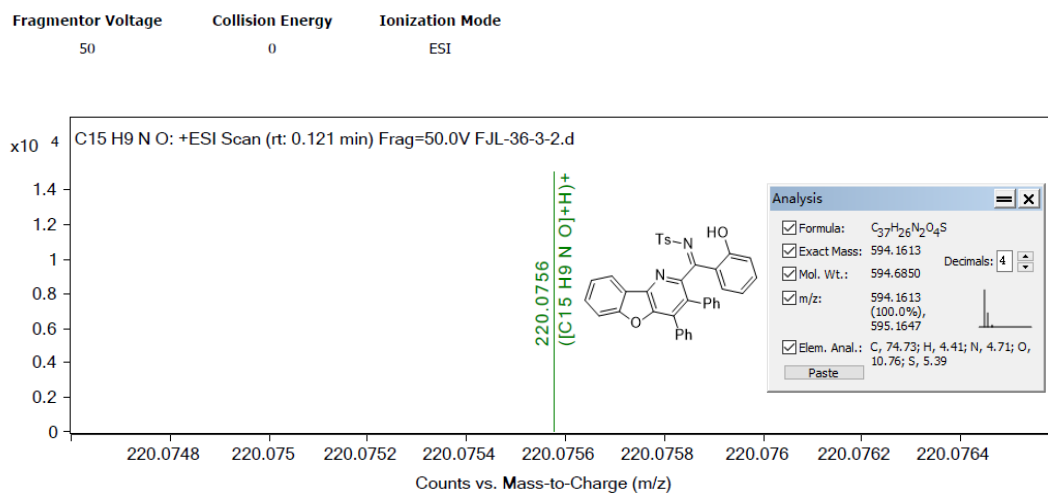

### (2) HRMS (ESI-TOF) spectra of 3a

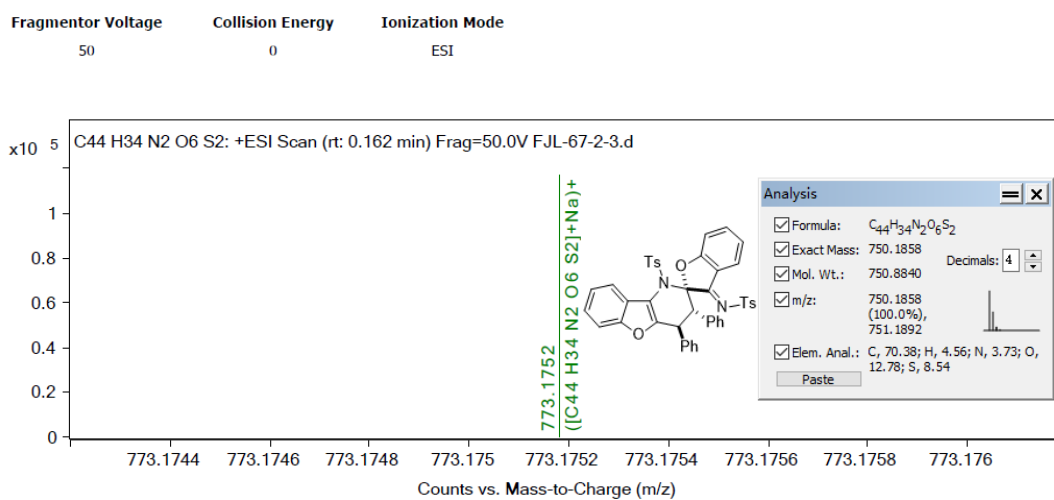

### (3) HRMS (ESI-TOF) spectra of 2p

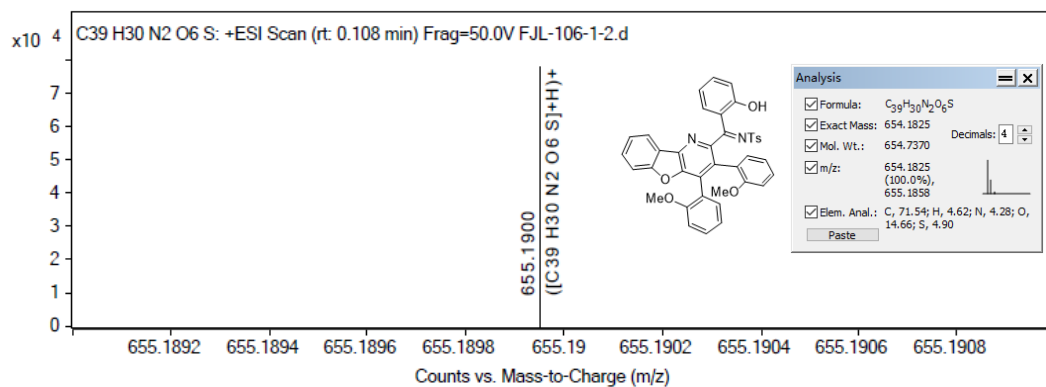

## 7. X-Ray crystallography of **2a** and **3a**

### (1) Method for crystal growth of **2a** and **3a**

The solid product 15 mg was added to a 25 mL round bottom flask fixed with a reflux condenser. 1 mL of *n*-hexane was added to the flask and heated to the boiling point of solvent. After the *n*-hexane started to boil and cool down by reflux condenser, 1 mL of dichloromethane (DCM) was added to the flask. The solvent system *n*-hexane/DCM was added in 1:1 ratio with continues stirring and heating, until all the solid was dissolved. Flask was kept with reflux condenser on for several days at room temperature, until tiny crystals started to grow in the bottom of flask, which subsequently grew with time.

### (2) Procedure for crystal measurement of **2a** and **3a**

A suitable crystal (0.01mm\*0.02mm\*0.03mm) was selected and mounted on a Bruker D8 venture diffractometer with Mo Ka radiation ( $\lambda = 0.71073 \text{ \AA}$ ) for cell determination and subsequent data collection at 170 K. Using Olex2,<sup>2</sup> the structure was solved with the ShelXT2 structure solution program using Intrinsic Phasing and refined with the ShelXL3 refinement package using Least Squares minimization.<sup>3,4</sup>

### (3) The ORTEP and crystal parameters of **2a** wherein thermal ellipsoids are drawn at 50% probability level

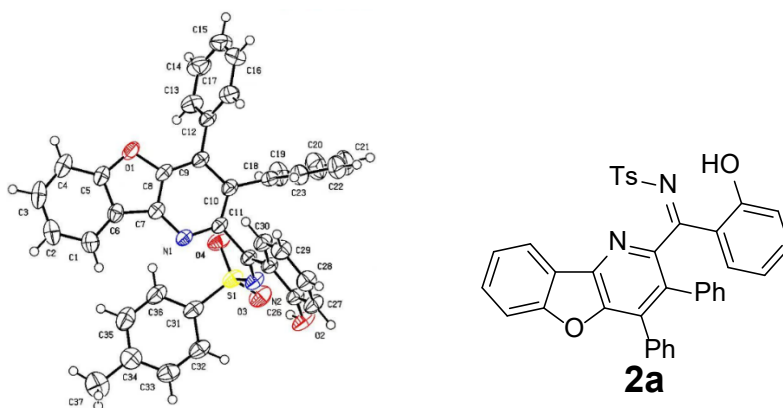

Bond precision: C-C = 0.0037 Å                      Wavelength=1.34139

Cell:                      a=7.8835 (12)                      b=14.574 (2)                      c=16.220 (2)  
                                   alpha=108.513 (4)                      beta=90.182 (4)                      gamma=98.579 (5)

Temperature:                      250 K

|                        | Calculated                | Reported                  |
|------------------------|---------------------------|---------------------------|
| Volume                 | 1744.8 (4)                | 1744.8 (4)                |
| Space group            | P -1                      | P -1                      |
| Hall group             | -P 1                      | -P 1                      |
| Moiety formula         | C37 H26 N2 O4 S, C4 H8 O2 | C37 H26 N2 O4 S, C4 H8 O2 |
| Sum formula            | C41 H34 N2 O6 S           | C41 H34 N2 O6 S           |
| Mr                     | 682.76                    | 682.76                    |
| Dx, g cm <sup>-3</sup> | 1.300                     | 1.300                     |
| Z                      | 2                         | 2                         |
| Mu (mm <sup>-1</sup> ) | 0.807                     | 0.807                     |
| F000                   | 716.0                     | 716.0                     |
| F000'                  | 718.18                    |                           |
| h, k, lmax             | 9, 18, 20                 | 9, 18, 20                 |
| Nref                   | 7211                      | 7126                      |
| Tmin, Tmax             | 0.962, 0.984              | 0.649, 0.751              |
| Tmin'                  | 0.831                     |                           |

Correction method= # Reported T Limits: Tmin=0.649 Tmax=0.751  
 AbsCorr = MULTI-SCAN

Data completeness= 0.988                      Theta(max)= 57.286

R(reflections)= 0.0573 ( 5180)                      wR2(reflections)=  
 0.1551 ( 7126)

S = 1.080                      Npar= 455

(4) The ORTEP and crystal parameters of **3a** wherein thermal ellipsoids are drawn at 50% probability level

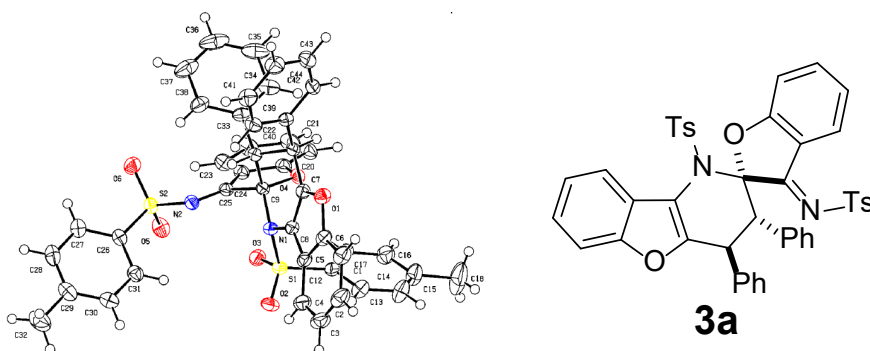

Bond precision: C-C = 0.0024 Å Wavelength=1.34139

Cell: a=10.1396(5) b=16.5438(8) c=23.8646(12)  
alpha=90 beta=101.338(2) gamma=90

Temperature: 170 K

|                        | Calculated                   | Reported         |
|------------------------|------------------------------|------------------|
| Volume                 | 3925.1(3)                    | 3925.1(3)        |
| Space group            | P 21/n                       | P 1 21/n 1       |
| Hall group             | -P 2yn                       | -P 2yn           |
| Moiety formula         | C44 H34 N2 O6 S2 [+ solvent] | C44 H34 N2 O6 S2 |
| Sum formula            | C44 H34 N2 O6 S2 [+ solvent] | C44 H34 N2 O6 S2 |
| Mr                     | 750.85                       | 750.85           |
| Dx, g cm <sup>-3</sup> | 1.271                        | 1.271            |
| Z                      | 4                            | 4                |
| Mu (mm <sup>-1</sup> ) | 1.070                        | 1.070            |
| F000                   | 1568.0                       | 1568.0           |
| F000'                  | 1573.68                      |                  |
| h, k, lmax             | 13, 21, 30                   | 13, 21, 30       |
| Nref                   | 9005                         | 8990             |
| Tmin, Tmax             | 0.938, 0.958                 | 0.673, 0.752     |
| Tmin'                  | 0.908                        |                  |

Correction method= # Reported T Limits: Tmin=0.673 Tmax=0.752  
AbsCorr = MULTI-SCAN

Data completeness= 0.998 Theta(max)= 60.636

R(reflections)= 0.0393( 7532) wR2(reflections)=  
0.1121( 8990)

S = 1.058 Npar= 489

## 8. References

1. S. Wang, X. Niu, H. Zhou, J. Cao, C. Guo, J. Chang, B. Zhu. Acid-Regulated Selective Synthesis of Benzofuran Derivatives via Single-Component BDA Retro-Aldol/Michael Addition Cascade and [4 + 2] Cycloaddition Reactions. *J. Org. Chem.* 2025, **90**, 7104–7119.
2. Dolomanov, O.V.; Bourhis, L. J.; Gildea, R. J.; Howard, J. A. K.; Puschmann, H., OLEX2: a complete structure solution, refinement and analysis program, *J. Appl. Cryst.* 2009, **42**, 339-341.
3. Sheldrick, G. M., SHELXT – Integrated space-group and crystal structure determination, *Acta Cryst.* 2015, **A71**, 3-8.
4. Sheldrick, G. M. Crystal structure refinement with SHELXL, *Acta Cryst.* 2015, **C71**, 3-8.
